# Supplementary material for: Cortical type: a conceptual tool for meaningful biological interpretation of high-throughput gene expression data in the human cerebral cortex
Source: Front Neuroanat. 2023 Jun 22;17:1187280. doi: 10.3389/fnana.2023.1187280 (PMC10323436; doi:10.3389/fnana.2023.1187280)
Supplement: Supplementary file 1 [file Table_1.XLSX]

## Sheet: Glutamate
	Z-Score data tables for each of the genes analyzed. The columns correspond to the brain regions studied and the sub-columns to
	each of the individuals in the Allen Brain Institute atlas. The probes that hybridize to each gene are represented in the rows and the
	intersection between rows and columns corresponds to the Z-Score value of glutamatergic transmission genes.
	Genes are represented by the name of the protein they are translated into, the gene ID in parentheses, and the web link to the ncbi library.
		Glutamate dehydrogenase 1 (GLUD1) / https://www.ncbi.nlm.nih.gov/gene/2746
			Parahippocampal gyrus						Temporal pole						Inferior temporal gyrus						Middle temporal gyrus						Superior temporal gyrus						Heschl's gyrus						caudate nucleus
			H0351, 2001	H0351,2002	H0351,1009	H0351,1012	H0351,1015	H0351,1016	H0351, 2001	H0351,2002	H0351,1009	H0351,1012	H0351,1015	H0351,1016	H0351, 2001	H0351,2002	H0351,1009	H0351,1012	H0351,1015	H0351,1016	H0351, 2001	H0351,2002	H0351,1009	H0351,1012	H0351,1015	H0351,1016	H0351, 2001	H0351,2002	H0351,1009	H0351,1012	H0351,1015	H0351,1016	H0351, 2001	H0351,2002	H0351,1009	H0351,1012	H0351,1015	H0351,1016	H0351, 2001	H0351,2002	H0351,1009	H0351,1012	H0351,1015	H0351,1016
		A_23_P138665	0.313207	-0.446066	0.124187	0.34359	-0.228686	-0.411874	-0.466044	-0.708886	-0.229444	-0.0753179		0.0312705	-0.496235	-0.828764	-0.188592	-0.355765	-0.986141	-0.533589	-0.472992	-1.03887	-0.214805	-0.453207	-1.05308	-0.578348	-0.382811	-1.26837	-0.776628	-0.547677	-1.25261	-0.920494	-0.471113	-1.40621	-0.9929	-0.644548	-1.76867	-1.54421	0.450774	-0.34311	0.520245	0.629202	-0.425608	0.0238385
		Glutamate dehydrogenase 2 (GLUD2) / https://www.ncbi.nlm.nih.gov/gene/2747
			Parahippocampal gyrus						Temporal pole						Inferior temporal gyrus						Middle temporal gyrus						Superior temporal gyrus						Heschl's gyrus						Caudate nucleus
			H0351, 2001	H0351,2002	H0351,1009	H0351,1012	H0351,1015	H0351,1016	H0351, 2001	H0351,2002	H0351,1009	H0351,1012	H0351,1015	H0351,1016	H0351, 2001	H0351,2002	H0351,1009	H0351,1012	H0351,1015	H0351,1016	H0351, 2001	H0351,2002	H0351,1009	H0351,1012	H0351,1015	H0351,1016	H0351, 2001	H0351,2002	H0351,1009	H0351,1012	H0351,1015	H0351,1016	H0351, 2001	H0351,2002	H0351,1009	H0351,1012	H0351,1015	H0351,1016	H0351, 2001	H0351,2002	H0351,1009	H0351,1012	H0351,1015	H0351,1016
		A_23_P45361	0.482561	0.920232	0.447091	1.71646	0.0283454	0.390001	0.483392	0.569556	0.717358	0.970278		0.964746	-0.0180846	0.0324301	0.209378	0.547665	-0.747509	-0.115966	0.0620305	-0.246064	0.374121	0.370177	-0.931735	-0.333339	0.096473	-0.5583	-0.215353	0.109496	-1.26245	-0.934579	-0.125637	-0.869924	-1.11434	0.0633517	-1.82359	-1.77704	0.662238	0.516481	0.600938	0.688158	-0.382693	0.562307
		CUST_287_PI416408490	0.180109	-0.170815	0.103449	0.514121	-0.142802	-0.0069025	-0.331248	-0.584023	0.00584204	-0.0575027		0.373286	-0.3811	-0.717305	-0.153787	-0.349549	-0.916963	-0.310581	-0.39512	-1.02077	-0.130374	-0.346425	-1.00886	-0.382752	-0.44514	-1	-0.734221	-0.59983	-1	-0.818869	-0.473022	-1.45357	-0.89919	-0.571337	-1.88905	-1.62861	0.201523	-0.290422	0.343439	0.456646	-0.402617	0.146384
		Glutamate-Ammonia Ligase (GLUL) / https://www.ncbi.nlm.nih.gov/gene/2752
			Parahippocampal gyrus						Temporal pole						Inferior temporal gyrus						Middle temporal gyrus						Superior temporal gyrus						Heschl's gyrus						caudate nucleus
			H0351, 2001	H0351,2002	H0351,1009	H0351,1012	H0351,1015	H0351,1016	H0351, 2001	H0351,2002	H0351,1009	H0351,1012	H0351,1015	H0351,1016	H0351, 2001	H0351,2002	H0351,1009	H0351,1012	H0351,1015	H0351,1016	H0351, 2001	H0351,2002	H0351,1009	H0351,1012	H0351,1015	H0351,1016	H0351, 2001	H0351,2002	H0351,1009	H0351,1012	H0351,1015	H0351,1016	H0351, 2001	H0351,2002	H0351,1009	H0351,1012	H0351,1015	H0351,1016	H0351, 2001	H0351,2002	H0351,1009	H0351,1012	H0351,1015	H0351,1016
		A_24_P53976	-0.184595	0.0641137	0.572005	1.52983	-0.371236	-0.0334408	0.32008	0.0612073	0.593001	0.681647		0.998544	-0.206928	-0.00969626	0.415787	0.643472	-0.93354	0.434624	0.136381	-0.136579	0.602081	0.640548	-0.771724	0.573059	-0.0887372	-0.346018	0.114199	0.616807	-1.18439	-0.127382	0.00903011	-0.45138	-0.47041	0.705169	-1.32872	-0.228032	-0.0887837	-0.191549	0.4089	1.11197	-0.624692	0.511236
		A_32_P156628	1.34222	0.173112	-0.373567	0.236865	-0.254896	0.362873	0.547877	0.241723	0.397078	-0.0940299		1.12951	1.00181	-0.132452	-0.0603281	-0.027772	-0.53592	0.829769	1.21707	0.0851306	0.0411073	-0.122943	-0.540952	0.789074	1.2988	-0.235658	-0.137653	-0.120829	-1.00283	0.477196	1.04097	-0.653114	-0.28424	-0.369726	-1.20998	-0.0122649	0.824616	-0.133462	-0.117279	0.0348956	-0.656368	0.351954
		NR1 subunit (GRIN1) of the NMDA receptor / https://www.ncbi.nlm.nih.gov/gene/2902
			Parahippocampal gyrus						Temporal pole						Inferior temporal gyrus						Middle temporal gyrus						Superior temporal gyrus						Heschl's gyrus						caudate nucleus
			H0351, 2001	H0351,2002	H0351,1009	H0351,1012	H0351,1015	H0351,1016	H0351, 2001	H0351,2002	H0351,1009	H0351,1012	H0351,1015	H0351,1016	H0351, 2001	H0351,2002	H0351,1009	H0351,1012	H0351,1015	H0351,1016	H0351, 2001	H0351,2002	H0351,1009	H0351,1012	H0351,1015	H0351,1016	H0351, 2001	H0351,2002	H0351,1009	H0351,1012	H0351,1015	H0351,1016	H0351, 2001	H0351,2002	H0351,1009	H0351,1012	H0351,1015	H0351,1016	H0351, 2001	H0351,2002	H0351,1009	H0351,1012	H0351,1015	H0351,1016
		A_23_P257962	0.771177	1.28372	0.0409365	0.526018	0.111654	0.155056	0.503374	1.62238	0.112328	0.531076		0.332936	0.545865	0.933024	0.533569	0.361752	0.427913	-0.112795	0.726127	1.38411	0.640389	0.517679	0.39052	-0.223689	0.799194	1.39341	0.303867	0.505801	0.0870807	-0.155239	0.422272	1.29584	1.09359	0.0832103	0.634961	0.18052	0.580219	0.931925	0.741502	0.414589	0.116907	0.836114
		A_23_P100278	0.5433	0.795543	-0.328344	-1.08987	-0.278294	1.42323	0.447647	0.662737	-0.812236	-0.474586		-0.535664	0.654576	0.531816	0.378592	-0.457976	0.15498	-0.241163	0.580484	0.609648	0.251715	-0.472739	0.144686	-0.514108	0.730976	0.69907	0.280004	-0.524818	0.287045	-0.00882729	0.943303	0.686346	-0.27018	-0.512921	0.0806341	0.232051	0.406082	0.345026	0.63787	0.312596	0.37123	0.19925
		A_23_P151264	1.129	0.526798	-0.259655	-0.758049	-0.318597	-0.376791	0.567483	0.420899	-0.370887	-0.100216		-0.253291	1.06058	0.534403	0.465039	-0.141484	-0.0978973	-0.259613	1.07481	0.459504	0.298343	0.0508698	0.0134664	-0.429165	1.33508	0.409855	0.0510109	-0.228259	0.0280128	-0.305532	1.50942	0.40913	0.355892	-0.32256	-0.176149	-0.210694	1.00237	0.175157	0.813	0.485045	0.252461	0.293166
		NR2A subunit (GRIN2A) of the NMDA / https://www.ncbi.nlm.nih.gov/gene/2903
			Parahippocampal gyrus						Temporal pole						Inferior temporal gyrus						Middle temporal gyrus						Superior temporal gyrus						Heschl's gyrus						Caudate nucleus
			H0351, 2001	H0351,2002	H0351,1009	H0351,1012	H0351,1015	H0351,1016	H0351, 2001	H0351,2002	H0351,1009	H0351,1012	H0351,1015	H0351,1016	H0351, 2001	H0351,2002	H0351,1009	H0351,1012	H0351,1015	H0351,1016	H0351, 2001	H0351,2002	H0351,1009	H0351,1012	H0351,1015	H0351,1016	H0351, 2001	H0351,2002	H0351,1009	H0351,1012	H0351,1015	H0351,1016	H0351, 2001	H0351,2002	H0351,1009	H0351,1012	H0351,1015	H0351,1016	H0351, 2001	H0351,2002	H0351,1009	H0351,1012	H0351,1015	H0351,1016
		A A_23_P303072	0.961513	0.492598	0.625146	0.616243	0.978981	0.780322	0.75211	0.758124	0.240979	0.605449		0.660487	1.06932	0.675319	0.749161	0.637352	0.934777	0.658374	1.0198	0.589045	0.804195	0.726212	0.952857	0.645625	1.06425	0.621319	0.670732	0.65223	0.862581	0.699296	1.15379	0.615786	0.886648	0.781326	0.905648	0.638882	-0.286935	-0.269107	-0.109913	-0.27796	-0.184496	-0.143888
		A A_23_P340617	1.24133	0.381574	0.355465	0.438887	0.963763	0.696832	0.703839	0.667522	0.286813	0.291943		0.663303	1.15877	0.61957	0.608849	0.353955	0.896987	0.643919	1.12144	0.567341	0.614133	0.433438	0.903963	0.57808	1.21727	0.549042	0.469402	0.346748	0.840082	0.66708	1.26582	0.582692	0.561538	0.409159	0.898296	0.588065	-0.0979016	-0.267149	-0.0684292	-0.369844	-0.226162	-0.123177
		A A_24_P143127	1.07541	0.35082	0.70441	0.320558	0.537727	0.497848	0.550291	0.534469	0.114097	0.282852		0.409213	1.0515	0.583253	0.794737	0.441427	0.649532	0.453123	1.00993	0.473504	0.820396	0.569668	0.605314	0.410315	1.08649	0.529161	0.570865	0.495525	0.560264	0.483846	1.22619	0.549237	1.04855	0.61449	0.554917	0.407202	-0.113354	-0.272939	0.0264426	-0.208516	-0.0541533	-0.140161
		GRIA1 subunit of the AMPA receptor / https://www.ncbi.nlm.nih.gov/gene/2890
			Parahippocampal gyrus						Temporal pole						Inferior temporal gyrus						Middle temporal gyrus						Superior temporal gyrus						Heschl's gyrus						caudate nucleus
			H0351, 2001	H0351,2002	H0351,1009	H0351,1012	H0351,1015	H0351,1016	H0351, 2001	H0351,2002	H0351,1009	H0351,1012	H0351,1015	H0351,1016	H0351, 2001	H0351,2002	H0351,1009	H0351,1012	H0351,1015	H0351,1016	H0351, 2001	H0351,2002	H0351,1009	H0351,1012	H0351,1015	H0351,1016	H0351, 2001	H0351,2002	H0351,1009	H0351,1012	H0351,1015	H0351,1016	H0351, 2001	H0351,2002	H0351,1009	H0351,1012	H0351,1015	H0351,1016	H0351, 2001	H0351,2002	H0351,1009	H0351,1012	H0351,1015	H0351,1016
		A_23_P303072	0.700512	0.346451	0.612352	0.702323	0.719581	0.343946	0.65568	0.360234	0.203318	0.848465		0.513788	0.574626	0.154601	0.44228	0.496232	0.441402	0.18927	0.469234	0.000184018	0.355439	0.402862	0.411482	0.143144	0.503089	-0.115946	0.281336	0.309932	0.413716	0.200353	0.415479	-0.261266	0.149608	0.262187	-0.0476762	-0.313801	0.605733	0.213745	0.329736	0.360782	0.512363	0.0898548
		CUST_13838_PI416261804	0.971726	0.618951	0.50917	0.830227	0.792503	0.536693	0.940405	0.671391	0.357834	0.845229		0.63826	0.670934	0.29246	0.559822	0.448451	0.507908	0.293202	0.641964	0.161788	0.430953	0.317159	0.519904	0.197989	0.653123	0.0566416	0.411433	0.239518	0.584828	0.255379	0.580494	0.18136	0.179657	0.187268	0.150985	-0.112332	0.666418	0.397141	0.531869	0.508494	0.27269	0.176667
		GRIA2 subunit of the AMPA receptor / https://www.ncbi.nlm.nih.gov/gene/2891
			Parahippocampal gyrus						Temporal pole						Inferior temporal gyrus						Middle temporal gyrus						Superior temporal gyrus						Heschl's gyrus						caudate nucleus
			H0351, 2001	H0351,2002	H0351,1009	H0351,1012	H0351,1015	H0351,1016	H0351, 2001	H0351,2002	H0351,1009	H0351,1012	H0351,1015	H0351,1016	H0351, 2001	H0351,2002	H0351,1009	H0351,1012	H0351,1015	H0351,1016	H0351, 2001	H0351,2002	H0351,1009	H0351,1012	H0351,1015	H0351,1016	H0351, 2001	H0351,2002	H0351,1009	H0351,1012	H0351,1015	H0351,1016	H0351, 2001	H0351,2002	H0351,1009	H0351,1012	H0351,1015	H0351,1016	H0351, 2001	H0351,2002	H0351,1009	H0351,1012	H0351,1015	H0351,1016
		A_23_P340617	0.273321	0.447337	0.564895	0.8225	0.852476	0.414332	0.481057	0.447339	-0.0726641	0.878837		0.715126	0.335579	0.443704	0.47806	0.836047	0.779931	0.545124	0.359195	0.260618	0.566112	0.923367	0.769656	0.550269	0.293774	0.318499	0.539227	0.84614	0.8016	0.631634	0.269211	0.259737	0.631748	0.752865	0.740299	0.403529	0.149051	0.143511	0.0975334	0.437114	0.499908	0.346998
		A_24_P914688	1.0782	0.00305196	0.213959	0.384484	0.808122	0.300594	0.0131797	0.175984	-0.651988	0.177883		0.673552	0.665511	0.0631818	0.423033	0.0823271	0.549527	0.28912	0.625917	-0.101275	0.32936	0.242625	0.582647	0.312835	0.755609	-0.14004	0.084274	0.166666	0.486298	0.357312	0.876065	-0.2263	0.488554	0.216884	0.297132	-0.0952155	0.998988	0.0283126	0.392409	0.813315	0.613448	0.4185
		A_32_P172339	0.272552	0.728889	0.518433	0.798701	1.02326	0.640948	0.341755	0.694249	0.356114	0.725615		0.803372	0.417583	0.571275	0.895581	0.713838	0.929104	0.635839	0.465437	0.500532	0.90736	0.85094	0.926737	0.660891	0.388103	0.596105	0.672457	0.734353	0.874415	0.611661	0.412121	0.625712	0.65636	0.524521	0.8297	0.478759	0.443639	0.255096	0.274853	0.449798	0.528647	0.277551
		GRIK1 subunit of the kainate receptor / https://www.ncbi.nlm.nih.gov/gene/2897
			Parahippocampal gyrus						Temporal pole						Inferior temporal gyrus						Middle temporal gyrus						Superior temporal gyrus						Heschl's gyrus						caudate nucleus
			H0351, 2001	H0351,2002	H0351,1009	H0351,1012	H0351,1015	H0351,1016	H0351, 2001	H0351,2002	H0351,1009	H0351,1012	H0351,1015	H0351,1016	H0351, 2001	H0351,2002	H0351,1009	H0351,1012	H0351,1015	H0351,1016	H0351, 2001	H0351,2002	H0351,1009	H0351,1012	H0351,1015	H0351,1016	H0351, 2001	H0351,2002	H0351,1009	H0351,1012	H0351,1015	H0351,1016	H0351, 2001	H0351,2002	H0351,1009	H0351,1012	H0351,1015	H0351,1016	H0351, 2001	H0351,2002	H0351,1009	H0351,1012	H0351,1015	H0351,1016
		A_23_P109286	0.106636	-0.39302	-0.197999	0.944596	0.540243	0.234553	0.142566	-0.0237354	0.409011	0.269686		0.404835	0.0980067	-0.30873	-0.376292	0.457687	0.295934	0.0702595	0.189897	-0.279443	-0.124429	0.358608	0.419464	0.00177367	0.168866	-0.314631	-0.255977	0.164335	0.412484	0.0163692	0.0318536	-0.18267	-0.737404	0.272342	0.132203	-0.0359019	0.0629852	0.517672	1.24844	0.189475	1.39748	0.824935
		CUST_1072_PI417557136	0.942386	0.296315	0.100396	0.546443	0.847321	0.793513	1.26388	0.882462	0.706156	0.517767		0.823249	0.979263	0.283111	0.228969	0.409576	0.998876	0.365605	1.06876	0.258939	0.0842531	-0.0834882	0.982945	0.199504	0.843747	0.201143	1.12255	0.195438	0.842987	0.305973	0.824811	0.719883	-0.155676	0.441989	0.444472	0.196666	2.36467	1.00151	1.55112	0.994753	1.45766	1.75188
		CUST_1165_PI417557136	0.955508	-0.286595	-0.0382155	-0.245223	0.420837	0.374983	0.643228	0.646538	0.318539	0.0592845		0.0285833	1.39675	0.391092	-0.522143	0.0451694	0.334231	0.382895	1.33033	0.358618	-0.364861	0.262831	0.401091	0.106891	1.42225	0.51424	0.0996596	0.293103	0.332442	0.293189	0.656941	0.36546	0.910635	-0.0648852	-0.138714	-0.611314	0.0945562	0.932714	1.37036	0.0234803	1.44703	0.708836
		GRIK2 subunit of the kainate receptor / https://www.ncbi.nlm.nih.gov/gene/2898
			Parahippocampal gyrus						Temporal pole						Inferior temporal gyrus						Middle temporal gyrus						Superior temporal gyrus						Heschl's gyrus						caudate nucleus
			H0351, 2001	H0351,2002	H0351,1009	H0351,1012	H0351,1015	H0351,1016	H0351, 2001	H0351,2002	H0351,1009	H0351,1012	H0351,1015	H0351,1016	H0351, 2001	H0351,2002	H0351,1009	H0351,1012	H0351,1015	H0351,1016	H0351, 2001	H0351,2002	H0351,1009	H0351,1012	H0351,1015	H0351,1016	H0351, 2001	H0351,2002	H0351,1009	H0351,1012	H0351,1015	H0351,1016	H0351, 2001	H0351,2002	H0351,1009	H0351,1012	H0351,1015	H0351,1016	H0351, 2001	H0351,2002	H0351,1009	H0351,1012	H0351,1015	H0351,1016
		A_23_P250136	0.898793	0.0196198	0.0670793	0.803734	0.95217	0.439661	0.277269	0.283839	0.0205192	0.604334		0.863276	0.537156	-0.166939	0.247472	0.137138	0.518582	0.160589	0.453472	-0.314389	0.24731	0.0971806	0.554366	0.0970205	0.72748	-0.50402	0.0833117	0.0514242	0.503416	0.146769	0.697322	-0.413615	-0.16058	0.22546	0.212501	-0.449361	0.342549	-0.669722	-0.192069	0.268783	-0.0421468	-0.106399
		A_24_P935839	0.115517	0.320121	0.787909	1.02917	0.827725	0.293709	0.61769	0.456655	0.653905	1.09263		0.798904	0.117	0.130276	0.64394	0.79415	0.497824	0.360041	0.155261	0.0321923	0.673282	0.846654	0.566197	0.387069	0.0505059	-0.063692	0.700298	0.714294	0.443932	0.482013	-0.0423713	0.0106092	0.616641	0.707049	0.346748	0.0706605	-0.311245	-0.43276	-0.08374	0.0839385	0.266205	-0.263828
		A_32_P115796	1.20602	-0.41252	0.133594	0.682021	1.01529	0.477819	0.476472	0.402354	0.026987	0.328611		0.745454	0.697294	-0.283504	-0.010477	-0.189854	0.468209	0.199269	0.603622	-0.311531	-0.143064	-0.160365	0.441298	-0.0471288	0.760777	-0.564055	-0.302456	-0.287982	0.414754	0.10747	0.82216	-0.58992	-0.214851	0.0746915	0.166912	-0.528879	0.598445	-0.386677	-0.0343312	0.462531	0.133671	0.0452993
		Metabotropic glutamate receptor 1 (mGluR1) / https://www.ncbi.nlm.nih.gov/gene/2911
			Parahippocampal gyrus						Temporal pole						Inferior temporal gyrus						Middle temporal gyrus						Superior temporal gyrus						Heschl's gyrus						caudate nucleus
			H0351, 2001	H0351,2002	H0351,1009	H0351,1012	H0351,1015	H0351,1016	H0351, 2001	H0351,2002	H0351,1009	H0351,1012	H0351,1015	H0351,1016	H0351, 2001	H0351,2002	H0351,1009	H0351,1012	H0351,1015	H0351,1016	H0351, 2001	H0351,2002	H0351,1009	H0351,1012	H0351,1015	H0351,1016	H0351, 2001	H0351,2002	H0351,1009	H0351,1012	H0351,1015	H0351,1016	H0351, 2001	H0351,2002	H0351,1009	H0351,1012	H0351,1015	H0351,1016	H0351, 2001	H0351,2002	H0351,1009	H0351,1012	H0351,1015	H0351,1016
		A_23_P30976	0.0557164	0.039022	-0.0378735	0.41279	0.390507	-0.0295754	0.837454	0.520258	0.0226299	0.666597		0.487409	0.495607	0.374063	0.0933607	0.555005	0.476128	0.387987	0.440522	0.251898	0.202412	0.451363	0.441741	0.258957	0.381719	0.224353	0.217447	0.383176	0.538027	0.381066	-0.048262	-0.0704126	-0.154218	0.313184	-0.435943	-0.351237	-1.05826	-0.469562	-0.729736	-0.778898	-0.0353049	-0.493785
		CUST_14602_PI416261804	0.187791	0.479066	0.00147165	0.4208	0.830563	0.549129	0.958345	1.05806	0.155174	1.02803		0.919814	0.577792	0.639379	0.376972	0.377591	0.911092	0.668864	0.514517	0.521706	0.297906	0.358322	0.81443	0.522251	0.509161	0.700928	0.585252	0.472721	0.813228	0.568919	0.0158013	0.298627	-0.198266	0.293906	0.495323	0.0131428	-0.52268	0.0176969	-0.385922	-0.361962	-0.0376938	0.201622
		CUST_320_PI416408490	0.785542	-0.742639	-0.587724	0.206075	0.455356	-0.0910257	0.787098	0.152503	0.0784075	0.247593		0.593119	0.786835	-0.299626	-0.0680687	-0.102022	0.430281	0.116004	0.69386	-0.35737	-0.277184	-0.219787	0.149352	-0.0390772	0.635286	-0.504169	-0.192543	-0.149149	0.38311	0.271702	0.352408	-0.668184	-0.862646	-0.299029	-0.86874	-0.728136	0.291106	-0.493066	0.00801138	0.00826629	0.224074	-0.114039
		Metabotropic glutamate receptor 2 (mGluR2) / https://www.ncbi.nlm.nih.gov/gene/2912
			Parahippocampal gyrus						Temporal pole						Inferior temporal gyrus						Middle temporal gyrus						Superior temporal gyrus						Heschl's gyrus						caudate nucleus
			H0351, 2001	H0351,2002	H0351,1009	H0351,1012	H0351,1015	H0351,1016	H0351, 2001	H0351,2002	H0351,1009	H0351,1012	H0351,1015	H0351,1016	H0351, 2001	H0351,2002	H0351,1009	H0351,1012	H0351,1015	H0351,1016	H0351, 2001	H0351,2002	H0351,1009	H0351,1012	H0351,1015	H0351,1016	H0351, 2001	H0351,2002	H0351,1009	H0351,1012	H0351,1015	H0351,1016	H0351, 2001	H0351,2002	H0351,1009	H0351,1012	H0351,1015	H0351,1016	H0351, 2001	H0351,2002	H0351,1009	H0351,1012	H0351,1015	H0351,1016
		A_23_P332178	0.2228	0.509279	-0.281464	-0.628304	0.557582	0.854671	0.599466	0.822471	0.00716965	-0.595901		-0.0217744	0.320086	0.708044	-0.725129	-0.332665	0.767219	0.123494	0.157665	0.530726	-0.690759	-0.618431	0.406415	-0.0134444	0.3882	1.35898	-0.146187	-0.00862758	0.538461	0.415898	0.371871	0.613854	0.552455	-0.410163	1.41187	0.192691	0.0233382	0.0545459	-1.82712	-1.40023	-0.438748	0.425883
		CUST_15592_PI416261804	1.38843	0.439815	0.636582	-0.420954	0.628371	0.801541	0.377412	0.737327	0.13374	0.0114864		0.478913	1.45918	0.28591	0.236695	-0.375719	0.83284	0.337266	1.61055	0.46093	0.612874	-0.597951	1.01025	0.25322	1.22057	0.284675	0.739012	-0.458308	0.891121	0.416262	1.60061	0.572817	0.456499	0.469413	1.47921	-0.72184	-0.501222	-1.15268	-1.50137	-1.27196	-1.82512	0.00174433
		CUST_15596_PI416261804	-0.395252	0.563475	-0.396638	-2.11443	0.0668822	0.853292	-1.27814	-0.560786	-1.18343	-1.39676		0.0177536	-0.494182	-0.06221	-1.19413	-1.26833	-0.0660955	0.212856	-0.544738	-0.123984	-0.767137	-1.12632	0.084248	0.101059	-0.326712	-0.162206	-1.17471	-1.26957	-0.121316	-0.0726826	-0.284249	-0.00133969	-0.602855	-2.72097	0.157656	0.0362569	0.178035	0.755746	-1.18412	-0.786852	0.169062	0.848687
		Metabotropic glutamate receptor 3 (mGluR3) / https://www.ncbi.nlm.nih.gov/gene/2913
			Parahippocampal gyrus						Temporal pole						Inferior temporal gyrus						Middle temporal gyrus						Superior temporal gyrus						Heschl's gyrus						caudate nucleus
			H0351, 2001	H0351,2002	H0351,1009	H0351,1012	H0351,1015	H0351,1016	H0351, 2001	H0351,2002	H0351,1009	H0351,1012	H0351,1015	H0351,1016	H0351, 2001	H0351,2002	H0351,1009	H0351,1012	H0351,1015	H0351,1016	H0351, 2001	H0351,2002	H0351,1009	H0351,1012	H0351,1015	H0351,1016	H0351, 2001	H0351,2002	H0351,1009	H0351,1012	H0351,1015	H0351,1016	H0351, 2001	H0351,2002	H0351,1009	H0351,1012	H0351,1015	H0351,1016	H0351, 2001	H0351,2002	H0351,1009	H0351,1012	H0351,1015	H0351,1016
		A_23_P20068	-0.157188	0.791768	0.145477	1.10868	0.199713	0.247739	0.596939	0.855572	0.239222	0.819708		0.416786	0.177194	0.730086	0.425135	0.890094	0.217124	0.351577	0.301631	0.63864	0.558658	0.828213	0.33766	0.598643	0.160294	0.685322	0.281067	0.867006	0.126291	0.24475	0.263243	0.648148	0.561449	0.742966	0.321251	0.397874	1.08155	1.11732	1.16049	1.42461	1.24179	1.23735
		CUST_16365_PI416261804	-0.62792	0.859269	0.0538899	1.14207	0.224974	0.252255	0.268849	0.913171	-0.0166021	0.778958		0.41451	-0.25852	0.740308	0.251973	0.891672	0.245519	0.342777	-0.0951225	0.655612	0.401976	0.79413	0.367342	0.610437	-0.282032	0.7822	0.160932	0.878354	0.129125	0.231047	-0.135653	0.778323	0.209863	0.711348	0.573742	0.536055	0.75818	1.22769	1.01932	1.42639	1.21595	1.29187
		CUST_321_PI416408490	-0.586498	0.779661	0.0294974	1.09754	0.238615	0.225875	0.302446	0.953336	0.019731	0.797897		0.414331	-0.213633	0.73513	0.22871	0.884585	0.240461	0.35001	-0.0220707	0.656429	0.407935	0.803723	0.433519	0.650829	-0.292422	0.760689	0.197224	0.89431	0.172537	0.264773	-0.016531	0.765114	0.191544	0.695364	0.587825	0.590423	0.756246	1.18538	0.963029	1.47198	1.23302	1.25989
		Excitatory amino acid transporter 3 (EAAT3) / https://www.ncbi.nlm.nih.gov/gene/6505
			Parahippocampal gyrus						Temporal pole						Inferior temporal gyrus						Middle temporal gyrus						Superior temporal gyrus						Heschl's gyrus						caudate nucleus
			H0351, 2001	H0351,2002	H0351,1009	H0351,1012	H0351,1015	H0351,1016	H0351, 2001	H0351,2002	H0351,1009	H0351,1012	H0351,1015	H0351,1016	H0351, 2001	H0351,2002	H0351,1009	H0351,1012	H0351,1015	H0351,1016	H0351, 2001	H0351,2002	H0351,1009	H0351,1012	H0351,1015	H0351,1016	H0351, 2001	H0351,2002	H0351,1009	H0351,1012	H0351,1015	H0351,1016	H0351, 2001	H0351,2002	H0351,1009	H0351,1012	H0351,1015	H0351,1016	H0351, 2001	H0351,2002	H0351,1009	H0351,1012	H0351,1015	H0351,1016
		A_23_P216468	-0.461216	0.137076	0.266595	0.991172	0.966188	0.162558	0.246828	0.317695	0.223408	0.681255		0.621172	-0.0826064	0.215524	-0.0193625	0.942639	1.00643	0.408087	-0.102627	0.192292	0.216461	0.816444	0.94247	0.491469	-0.203872	0.124374	0.225554	0.649581	1.08688	0.481781	-0.560709	-0.064146	-0.265746	0.54906	0.707451	0.484469	-0.583343	0.159346	-0.375807	0.00116764	0.81313	0.0403347
		A_24_P232252	0.360621	-0.688353	-0.12375	-0.56702	0.125838	-0.378328	0.0136332	-0.749212	-0.707978	-0.683754		-0.322304	0.399701	-0.857914	0.362176	-0.65799	-0.145086	-0.636878	0.267109	-1.22224	0.207005	-0.486329	-0.207813	-0.73618	0.2579	-1.27143	-0.294828	-0.767471	-0.286	-0.599248	0.312849	-1.56212	0.186586	-0.917875	-0.823974	-1.00702	0.741331	-0.419435	0.377866	0.204542	0.556728	0.0189075
		Excitatory amino acid transporter 2 (EAAT2) / https://www.ncbi.nlm.nih.gov/gene/6506
			Parahippocampal gyrus						Temporal pole						Inferior temporal gyrus						Middle temporal gyrus						Superior temporal gyrus						Heschl's gyrus						caudate nucleus
			H0351, 2001	H0351,2002	H0351,1009	H0351,1012	H0351,1015	H0351,1016	H0351, 2001	H0351,2002	H0351,1009	H0351,1012	H0351,1015	H0351,1016	H0351, 2001	H0351,2002	H0351,1009	H0351,1012	H0351,1015	H0351,1016	H0351, 2001	H0351,2002	H0351,1009	H0351,1012	H0351,1015	H0351,1016	H0351, 2001	H0351,2002	H0351,1009	H0351,1012	H0351,1015	H0351,1016	H0351, 2001	H0351,2002	H0351,1009	H0351,1012	H0351,1015	H0351,1016	H0351, 2001	H0351,2002	H0351,1009	H0351,1012	H0351,1015	H0351,1016
		A_23_P162068	1.29882	0.95566	1.17694	1.59287	0.0926615	0.462215	0.394749	0.655087	1.34401	1.0764		1.04706	0.647687	0.413105	0.946422	1.03704	-0.54796	0.396658	0.761176	0.291699	0.961135	1.11105	-0.784482	0.170618	0.82959	0.130388	0.603441	0.978235	-1.02617	-0.320082	1.19178	-0.136797	0.108033	0.817314	-1.77727	-1.19919	1.6434	0.985593	1.57347	1.62116	0.154732	0.998758
		A_24_P350759	1.10861	0.701426	1.08391	1.4152	0.104631	0.548297	0.575518	0.824686	1.235	1.06948		1.01531	0.900684	0.595447	0.995164	0.957138	-0.603991	0.373761	1.00049	0.468606	1.00455	1.03134	-0.777562	0.199622	1.04178	0.191911	0.718219	0.95444	1.06996	-0.358516	0.953127	-0.287768	0.0956988	0.701062	-1.93031	-1.36546	1.53529	0.923776	1.47085	1.68689	0.205426	1.12684
		Vesicular glutamate transporter 1 (VGLUT1) / https://www.ncbi.nlm.nih.gov/gene/57030
			Parahippocampal gyrus						Temporal pole						Inferior temporal gyrus						Middle temporal gyrus						Superior temporal gyrus						Heschl's gyrus						caudate nucleus
			H0351, 2001	H0351,2002	H0351,1009	H0351,1012	H0351,1015	H0351,1016	H0351, 2001	H0351,2002	H0351,1009	H0351,1012	H0351,1015	H0351,1016	H0351, 2001	H0351,2002	H0351,1009	H0351,1012	H0351,1015	H0351,1016	H0351, 2001	H0351,2002	H0351,1009	H0351,1012	H0351,1015	H0351,1016	H0351, 2001	H0351,2002	H0351,1009	H0351,1012	H0351,1015	H0351,1016	H0351, 2001	H0351,2002	H0351,1009	H0351,1012	H0351,1015	H0351,1016	H0351, 2001	H0351,2002	H0351,1009	H0351,1012	H0351,1015	H0351,1016
		A_23_P162068	1.29882	0.95566	1.17694	1.59287	0.0926615	0.462215	0.944146	1.28617	0.576704	0.784442		0.631833	0.863319	1.07484	0.824614	0.741217	0.826364	0.632783	0.835159	0.954988	0.693247	0.71515	0.770564	0.516722	0.811898	0.905517	0.773012	0.694854	0.812889	0.630302	1.19178	-0.136797	0.108033	0.817314	-1.77727	-1.19919	-0.972877	-0.559303	-1.67934	-1.3023	-1.29629	-0.888079
		A_24_P350759	1.10861	0.701426	1.08391	1.4152	0.104631	0.548297	1.01456	1.00859	0.663861	0.89869		0.964367	0.811666	0.961483	0.761663	0.726481	1.32094	1.00064	0.859071	0.946325	0.525314	0.850931	1.23443	0.925044	0.698822	0.909695	0.773889	0.946877	1.33461	0.994398	0.953127	-0.287768	0.0956988	0.701062	-1.93031	-1.36546	-0.764225	-0.158722	-0.848204	-0.971943	-1.24154	-1.3835
		Vesicular glutamate transporte 3 (VGLUT3) / https://www.ncbi.nlm.nih.gov/gene/246213
			Parahippocampal gyrus						Temporal pole						Inferior temporal gyrus						Middle temporal gyrus						Superior temporal gyrus						Heschl's gyrus						caudate nucleus
			H0351, 2001	H0351,2002	H0351,1009	H0351,1012	H0351,1015	H0351,1016	H0351, 2001	H0351,2002	H0351,1009	H0351,1012	H0351,1015	H0351,1016	H0351, 2001	H0351,2002	H0351,1009	H0351,1012	H0351,1015	H0351,1016	H0351, 2001	H0351,2002	H0351,1009	H0351,1012	H0351,1015	H0351,1016	H0351, 2001	H0351,2002	H0351,1009	H0351,1012	H0351,1015	H0351,1016	H0351, 2001	H0351,2002	H0351,1009	H0351,1012	H0351,1015	H0351,1016	H0351, 2001	H0351,2002	H0351,1009	H0351,1012	H0351,1015	H0351,1016
		A_23_P162068	1.29882	0.95566	1.17694	1.59287	0.0926615	0.462215	0.358204	0.0797918	0.930893	0.538355		0.287847	0.0284954	-0.140025	0.2735	0.226126	0.0740081	-0.175673	-0.0448529	-0.246463	0.207369	0.00280465	-0.0302601	-0.276991	0.0723149	-0.261091	0.254247	-0.141747	0.0636925	-0.265869	1.19178	-0.136797	0.108033	0.817314	-1.77727	-1.19919	0.74337	0.684695	0.711591	0.635063	0.906217	0.756191
		A_24_P350759	1.10861	0.701426	1.08391	1.4152	0.104631	0.548297	0.0985192	-0.308177	0.20937	0.0632983		-0.0964515	-0.203939	-0.63253	-0.0350595	0.0462853	-0.185288	-0.454347	-0.249886	-0.503938	-0.0523091	-0.244499	-0.187649	-0.701789	-0.182323	-0.640868	-0.150358	-0.150932	-0.469182	-0.380636	0.953127	-0.287768	0.0956988	0.701062	-1.93031	-1.36546	0.482457	-0.0357586	-0.0892856	0.629876	0.643544	0.562015

## Sheet: GABA
	Z-Score data tables for each of the genes analyzed. The columns correspond to the brain regions studied and the sub-columns to
	each of the individuals in the Allen Brain Institute atlas. The probes that hybridize to each gene are represented in the rows and the
	intersection between rows and columns corresponds to the Z-Score value of GABAergic transmission genes.
	Genes are represented by the name of the protein they are translated into, the gene ID in parentheses, and the web link to the ncbi library.
		Glutamate descarboxilase 1 (GAD1) / https://www.ncbi.nlm.nih.gov/gene/2571
			Parahippocampal gyrus						Temporal pole						Inferior temporal gyrus						Middle temporal gyrus						Superior temporal gyrus						Heschl's gyrus						caudate nucleus
			H0351, 2001	H0351, 200	1H0351,200	2H0351,200	2H0351,100	9H0351,100	H0351, 2001	H0351, 200	1H0351,200	2H0351,200	2H0351,100	9H0351,100	H0351, 2001	H0351, 200	1H0351,200	2H0351,200	2H0351,100	9H0351,100	H0351, 2001	H0351, 200	1H0351,200	2H0351,200	2H0351,100	9H0351,100	H0351, 2001	H0351, 200	1H0351,200	2H0351,200	2H0351,100	9H0351,100	H0351, 2001	H0351, 200	1H0351,200	2H0351,200	2H0351,100	9H0351,100	H0351, 2001	H0351, 200	1H0351,200	2H0351,200	2H0351,100	9H0351,100
		A_23_P209578	0.238517	-0.382813	-0.156301	-0.598682	0.351178	0.321143	-0.234342	-0.268012	-0.085229	-0.370764		0.368529	0.332585	-0.00241891	-0.256535	-0.361289	0.262082	0.271334	0.25301	0.0840881	-0.0835877	0.0734612	0.390347	0.330477	0.346341	0.327709	-0.245616	-0.131665	0.149356	0.114602	0.261742	-0.0859257	-0.743114	-0.477354	1.0478	1.12614	1.14237	1.40655	1.16947	0.766486	1.63669	1.76465
		A_23_P374689	-0.138046	-0.144003	0.33705	0.279577	0.471682	0.0867264	0.0108707	0.126047	0.322547	0.0982063		0.432074	-0.0268158	0.180152	-0.166614	0.292048	0.442909	0.321192	0.0978758	0.176577	0.112145	0.312548	0.476109	0.312328	0.0642545	0.259961	0.0963802	0.264704	0.477824	0.429783	-0.0951356	0.314581	-0.136304	0.280857	0.411354	0.493745	0.0285353	0.170428	0.242527	0.505513	0.724952	0.520257
		A_24_P319711	0.770392	-0.625403	0.20233	-0.0323975	0.405948	0.0789812	-0.186476	-0.0995637	0.460684	-0.276198		0.304458	0.601596	-0.133369	0.0853725	-0.217471	0.257611	0.0473142	0.558291	-0.137256	0.15756	-0.118505	0.230525	-0.0228172	0.7763	-0.13996	0.063047	-0.0985304	0.172285	0.0487077	0.765564	-0.193754	-0.100094	-0.141508	0.17153	0.042616	0.824259	0.124839	0.570976	0.432084	0.321301	0.46552
		Glutaminase (GLS) / https://www.ncbi.nlm.nih.gov/gene/2744
			Parahippocampal gyrus						Temporal pole						Inferior temporal gyrus						Middle temporal gyrus						Superior temporal gyrus						Heschl's gyrus						caudate nucleus
			H0351, 2001	H0351, 200	1H0351,200	2H0351,200	2H0351,100	9H0351,100	H0351, 2001	H0351, 200	1H0351,200	2H0351,200	2H0351,100	9H0351,100	H0351, 2001	H0351, 200	1H0351,200	2H0351,200	2H0351,100	9H0351,100	H0351, 2001	H0351, 200	1H0351,200	2H0351,200	2H0351,100	9H0351,100	H0351, 2001	H0351, 200	1H0351,200	2H0351,200	2H0351,100	9H0351,100	H0351, 2001	H0351, 200	1H0351,200	2H0351,200	2H0351,100	9H0351,100	H0351, 2001	H0351, 200	1H0351,200	2H0351,200	2H0351,100	9H0351,100
		A_23_P39766	-0.00798831	-0.296443	0.281076	0.412287	0.779109	-0.0116384	-0.363814	-0.165559	-0.834413	0.307549		0.428936	-0.0255737	0.103162	0.819155	0.274252	0.755958	0.31065	-0.0222972	-0.0765673	0.630259	0.355708	0.695065	0.350458	0.154527	0.0747011	0.518788	0.342394	0.637515	0.531867	0.0687112	0.0197625	0.295532	0.359476	0.511295	0.170248	-1.50802	-1.43487	-0.981977	-0.978547	-0.793708	-1.28158
		A_24_P294233	-0.49112	0.496223	0.0863796	0.657563	0.801889	0.330736	0.151243	0.646021	-0.485463	0.51933		0.547222	0.624794	0.182031	0.828716	-0.0753033	1.05365	0.608384	0.0582251	0.584736	0.378113	0.81184	1.03963	0.66016	-0.0484821	0.646773	0.39845	0.871869	0.956976	0.771085	-0.128781	0.794487	0.351213	0.719298	0.709679	0.738137	-1.93769	-0.921135	-1.58612	-1.00146	-0.287508	-0.738129
		CUST_14980_PI416261804	-0.505969	0.248735	0.394639	0.598062	0.984017	0.248285	0.195811	0.388353	-0.447763	0.404012		0.455962	0.0163764	0.432463	0.563756	0.469113	0.954698	0.436356	-2.10184e-05	0.30465	0.607744	0.560362	0.921478	0.448112	-0.0688669	0.371809	0.610883	0.572363	0.930446	0.657966	-0.0626575	0.314026	0.414541	0.858872	0.554546	0.367281	-2.16059	-1.14851	-1.47018	-1.00736	-0.307327	-0.874394
		4-aminobutyrate aminotransferase (ABAT) / https://www.ncbi.nlm.nih.gov/gene/18
			Parahippocampal gyrus						Temporal pole						Inferior temporal gyrus						Middle temporal gyrus						Superior temporal gyrus						Heschl's gyrus						caudate nucleus
			H0351, 2001	H0351, 200	1H0351,200	2H0351,200	2H0351,100	9H0351,100	H0351, 2001	H0351, 200	1H0351,200	2H0351,200	2H0351,100	9H0351,100	H0351, 2001	H0351, 200	1H0351,200	2H0351,200	2H0351,100	9H0351,100	H0351, 2001	H0351, 200	1H0351,200	2H0351,200	2H0351,100	9H0351,100	H0351, 2001	H0351, 200	1H0351,200	2H0351,200	2H0351,100	9H0351,100	H0351, 2001	H0351, 200	1H0351,200	2H0351,200	2H0351,100	9H0351,100	H0351, 2001	H0351, 200	1H0351,200	2H0351,200	2H0351,100	9H0351,100
		A_23_P152505	0.216641	-0.295804	0.646462	0.873972	0.560394	-0.0475731	-0.285577	-0.258024	0.232051	0.0142959		0.400768	-0.105686	-0.211001	0.0854993	0.227474	0.553283	0.217189	0.0822552	-0.175546	0.369255	0.304026	0.767678	0.207717	0.317784	-0.246325	0.172204	0.166457	0.716847	0.0950366	0.191082	-0.232815	-0.74595	0.294255	0.487337	0.282993	0.817239	0.598361	1.11038	0.739048	1.05358	0.934331
		A_24_P330684	1.0158	-0.806763	-0.506044	-0.751947	0.0555678	-0.341144	-0.51637	-0.729889	-0.498113	-1.2728		-0.23066	0.398054	-0.828764	-0.307304	-1.24628	-0.164859	-0.431892	0.328179	-0.993534	-0.241187	-1.3354	-0.0906409	-0.55559	0.698659	-1.13407	-0.554053	-1.35794	-0.297205	-0.623228	0.845738	-1.28654	-1.10703	-1.23846	-0.75196	-0.810979	1.10592	-0.210521	0.784172	0.273219	0.237696	0.777908
		CUST_52_PI416408490	-0.62146	-0.565252	0.716517	1.46001	0.954353	0.182592	0.0916768	-0.30696	0.0481814	0.495134		0.448279	-0.80511	-0.528493	0.0156139	0.704903	0.801399	0.367438	-0.410036	-0.389896	0.219546	0.708193	1.10105	0.424184	-0.58622	-0.551564	0.333443	0.57615	1.06579	0.43968	-0.549935	-0.121316	-0.445578	0.901789	0.471318	0.533028	-0.190749	-0.196882	0.283548	0.649068	1.02901	1.02512
		beta3 ionotropic GABA receptor (GABRB3) / https://www.ncbi.nlm.nih.gov/gene/2562
			Parahippocampal gyrus						Polo temporal						Inferior temporal gyrus						Middle temporal gyrus						Superior temporal gyrus						Heschl's gyrus						caudate nucleus
			H0351, 2001	H0351, 200	1H0351,200	2H0351,200	2H0351,100	9H0351,100	H0351, 2001	H0351, 200	1H0351,200	2H0351,200	2H0351,100	9H0351,100	H0351, 2001	H0351, 200	1H0351,200	2H0351,200	2H0351,100	9H0351,100	H0351, 2001	H0351, 200	1H0351,200	2H0351,200	2H0351,100	9H0351,100	H0351, 2001	H0351, 200	1H0351,200	2H0351,200	2H0351,100	9H0351,100	H0351, 2001	H0351, 200	1H0351,200	2H0351,200	2H0351,100	9H0351,100	H0351, 2001	H0351, 200	1H0351,200	2H0351,200	2H0351,100	9H0351,100
		A_23_P10966	1.06035	0.499731	0.378563	0.783	0.928105	0.5936	0.690774	0.640092	-0.206667	0.802192		0.681713	0.718025	0.373636	0.342679	0.532362	0.802961	0.338928	0.623662	0.223256	0.324291	0.521781	0.800957	0.218232	0.759656	0.115799	0.280429	0.453777	0.784188	0.322321	0.854607	0.105126	0.356488	0.607272	0.466435	-0.0554367	0.753475	0.286073	0.611214	0.530776	0.574827	0.589877
		A_23_P14821	0.989116	0.498749	0.354182	0.692832	1.28948	0.830385	0.740637	0.606245	-0.00410232	0.922945		0.909766	0.813021	0.319478	0.280454	0.651956	1.07494	0.514946	0.804581	0.209797	0.179728	0.699735	1.01156	0.381284	0.790738	0.0912441	0.191441	0.567385	0.962847	0.446429	0.597496	0.0890604	0.169923	0.270617	1.09575	0.0964715	0.732862	0.467887	0.130742	0.409408	0.567049	0.476866
		alpha1 ionotropic GABA receptor (GABRA1) / https://www.ncbi.nlm.nih.gov/gene/2554
			Parahippocampal gyrus						Temporal pole						Inferior temporal gyrus						Middle temporal gyrus						Superior temporal gyrus						Heschl's gyrus						caudate nucleus
			H0351, 2001	H0351, 200	1H0351,200	2H0351,200	2H0351,100	9H0351,100	H0351, 2001	H0351, 200	1H0351,200	2H0351,200	2H0351,100	9H0351,100	H0351, 2001	H0351, 200	1H0351,200	2H0351,200	2H0351,100	9H0351,100	H0351, 2001	H0351, 200	1H0351,200	2H0351,200	2H0351,100	9H0351,100	H0351, 2001	H0351, 200	1H0351,200	2H0351,200	2H0351,100	9H0351,100	H0351, 2001	H0351, 200	1H0351,200	2H0351,200	2H0351,100	9H0351,100	H0351, 2001	H0351, 200	1H0351,200	2H0351,200	2H0351,100	9H0351,100
		A_23_P125067	0.0219178	0.200241	0.288442	0.294805	0.777363	0.259294	0.220034	0.33413	0.0852681	0.134132		0.277684	0.366818	0.399046	0.409596	0.44538	0.871821	0.465228	0.428272	0.402519	0.488794	0.56215	0.937888	0.502041	0.35363	0.500505	0.49435	0.533926	0.823034	0.561692	0.344144	0.585414	0.390648	0.539308	1.09472	0.737567	-1.42001	-1.08406	-1.53352	-1.21511	-0.817791	-1.24515
		A_24_P226267	-0.14675	0.432866	0.403873	0.364956	0.662047	0.284813	0.449432	0.531367	0.205265	0.144368		0.259837	0.381087	0.545961	0.444383	0.463546	0.88428	0.430693	0.426935	0.520362	0.598611	0.519445	0.964372	0.421596	0.309661	0.58702	0.642706	0.454348	0.846176	0.527143	0.30933	0.73761	0.56743	0.763742	0.928008	0.736712	-1.73001	-1.12447	-1.62804	-1.39905	-0.856549	-1.24267
		gamma2 ionotropic GABA receptor (GABRG2) / https://www.ncbi.nlm.nih.gov/gene/2566
			Parahippocampal gyrus						Polo temporal						Inferior temporal gyrus						Middle temporal gyrus						Superior temporal gyrus						Heschl's gyrus						caudate nucleus
			H0351, 2001	H0351, 200	1H0351,200	2H0351,200	2H0351,100	9H0351,100	H0351, 2001	H0351, 200	1H0351,200	2H0351,200	2H0351,100	9H0351,100	H0351, 2001	H0351, 200	1H0351,200	2H0351,200	2H0351,100	9H0351,100	H0351, 2001	H0351, 200	1H0351,200	2H0351,200	2H0351,100	9H0351,100	H0351, 2001	H0351, 200	1H0351,200	2H0351,200	2H0351,100	9H0351,100	H0351, 2001	H0351, 200	1H0351,200	2H0351,200	2H0351,100	9H0351,100	H0351, 2001	H0351, 200	1H0351,200	2H0351,200	2H0351,100	9H0351,100
		A_23_P213920	0.212446	-0.897875	-0.40312	0.182774	0.163653	-0.256741	-0.411284	-0.480163	-0.980814	0.213828		-0.10073	-0.00326081	-0.461949	-0.0952827	0.260702	0.361173	-0.0762911	0.0414251	-0.53694	-0.0805622	0.332158	0.420885	-0.102241	0.204414	-0.467172	-0.100147	0.353176	0.450087	0.127479	0.425246	-0.416555	-0.235139	0.490867	0.134003	-0.0161342	-0.85857	-1.62856	-1.33486	-1.19449	-0.828569	-1.2243
		A_23_P410482	0.172534	-0.665081	-0.124143	-0.607213	0.400554	-0.059231	-0.723457	-0.116829	-0.784864	-0.677072		-0.0757532	0.355023	-0.164527	0.185361	-0.462617	0.460966	-0.0346769	0.26024	-0.292168	0.343866	-0.271082	0.523661	-0.0110975	0.379889	-0.207231	0.057902	-0.303035	0.357926	0.114299	0.781338	-0.248902	0.408024	-0.282385	0.415775	-0.250007	-1.03962	-1.16132	-1.15581	-1.3405	-0.791703	-0.861116
		A_32_P25514	-0.430808	-0.103474	-0.0583194	-0.312189	0.232096	-0.134334	-0.549547	0.356146	-0.271912	-0.361445		0.209292	0.00331246	0.455521	0.140143	0.118692	0.681206	0.518746	0.0725907	0.492709	0.355135	0.208332	0.708584	0.549466	0.121114	0.647399	0.53216	0.296746	0.735105	0.76931	0.0856838	0.728787	0.199032	0.257727	0.810096	0.854737	-1.34628	-0.608697	-1.37222	-1.74885	-0.816426	-0.921079
		delta ionotropic GABA receptor (GABRD) / https://www.ncbi.nlm.nih.gov/gene/2563
			Parahippocampal gyrus						Polo temporal						Inferior temporal gyrus						Middle temporal gyrus						Superior temporal gyrus						Heschl's gyrus						caudate nucleus
			H0351, 2001	H0351, 200	1H0351,200	2H0351,200	2H0351,100	9H0351,100	H0351, 2001	H0351, 200	1H0351,200	2H0351,200	2H0351,100	9H0351,100	H0351, 2001	H0351, 200	1H0351,200	2H0351,200	2H0351,100	9H0351,100	H0351, 2001	H0351, 200	1H0351,200	2H0351,200	2H0351,100	9H0351,100	H0351, 2001	H0351, 200	1H0351,200	2H0351,200	2H0351,100	9H0351,100	H0351, 2001	H0351, 200	1H0351,200	2H0351,200	2H0351,100	9H0351,100	H0351, 2001	H0351, 200	1H0351,200	2H0351,200	2H0351,100	9H0351,100
		A_23_P309720	-0.309086	0.526586	0.56041	0.457519	0.668693	0.557978	0.453677	0.823809	0.543943	0.479915		0.556726	0.215439	0.854334	0.614539	0.647236	0.980746	0.771839	0.322423	0.923629	0.780167	0.732141	1.03357	0.797786	0.23047	0.985954	0.883787	0.774188	1.03566	0.877991	0.168171	1.04952	0.860486	0.776591	1.05411	1.08388	-0.284963	0.741784	0.404761	0.290989	0.66733	0.647834
		A_32_P181822	0.726892	0.434583	0.179809	0.0772986	0.110029	0.341383	0.471172	0.541206	0.0603243	0.134498		0.151904	0.799082	0.742116	0.350464	0.259696	0.358092	0.332544	0.838619	0.816418	0.480057	0.287412	0.382476	0.181101	0.89445	0.842351	0.251463	0.345226	0.386017	0.339573	1.0407	0.737655	0.7716	0.346118	0.305277	0.460335	0.944198	0.850057	0.842229	0.673216	0.495798	0.661594
		Metabotropic GABA receptor subunit 2 (GABBR2) / https://www.ncbi.nlm.nih.gov/gene/9568
			Parahippocampal gyrus						Temporal pole						Inferior temporal gyrus						Middle temporal gyrus						Superior temporal gyrus						Heschl's gyrus						caudate nucleus
			H0351, 2001	H0351, 200	1H0351,200	2H0351,200	2H0351,100	9H0351,100	H0351, 2001	H0351, 200	1H0351,200	2H0351,200	2H0351,100	9H0351,100	H0351, 2001	H0351, 200	1H0351,200	2H0351,200	2H0351,100	9H0351,100	H0351, 2001	H0351, 200	1H0351,200	2H0351,200	2H0351,100	9H0351,100	H0351, 2001	H0351, 200	1H0351,200	2H0351,200	2H0351,100	9H0351,100	H0351, 2001	H0351, 200	1H0351,200	2H0351,200	2H0351,100	9H0351,100	H0351, 2001	H0351, 200	1H0351,200	2H0351,200	2H0351,100	9H0351,100
		A_23_P112275	0.426452	0.620002	0.436278	0.4355	0.899658	0.548596	0.793027	0.850056	0.385664	0.472147		0.418645	0.550619	0.711768	0.654576	0.600413	0.969562	0.477754	0.603689	0.656964	0.666615	0.58197	1.01635	0.417717	0.537633	0.651562	0.645008	0.514078	0.979788	0.522694	0.480912	0.802845	0.546949	0.522375	0.645333	0.428001	-2.39018	-1.92581	-2.17284	-2.33172	-2.17498	-2.24845
		CUST_16821_PI416261804	0.373901	0.74493	0.52261	0.336053	0.742629	0.449722	0.983522	1.05579	0.438284	0.460249		0.319643	0.58969	0.900496	0.579674	0.56634	0.895822	0.45336	0.597661	0.802139	0.670116	0.566429	0.917636	0.332835	0.583685	0.805543	0.681687	0.442575	0.896097	0.493933	0.436755	0.846772	0.52548	0.571962	0.625467	0.348807	-2.35598	-1.56079	-1.96056	-2.33176	-2.26629	-2.28831
		Metabotropic GABA receptor subunit1 (GABBR1) / https://www.ncbi.nlm.nih.gov/gene/2550
			Parahippocampal gyrus						Temporal pole						Inferior temporal gyrus						Middle temporal gyrus						Superior temporal gyrus						Heschl's gyrus						caudate nucleus
			H0351, 2001	H0351, 200	1H0351,200	2H0351,200	2H0351,100	9H0351,100	H0351, 2001	H0351, 200	1H0351,200	2H0351,200	2H0351,100	9H0351,100	H0351, 2001	H0351, 200	1H0351,200	2H0351,200	2H0351,100	9H0351,100	H0351, 2001	H0351, 200	1H0351,200	2H0351,200	2H0351,100	9H0351,100	H0351, 2001	H0351, 200	1H0351,200	2H0351,200	2H0351,100	9H0351,100	H0351, 2001	H0351, 200	1H0351,200	2H0351,200	2H0351,100	9H0351,100	H0351, 2001	H0351, 200	1H0351,200	2H0351,200	2H0351,100	9H0351,100
		A_23_P93302	-0.602512	0.941551	0.437992	1.27857	0.942377	0.694714	0.339624	1.28519	0.344124	1.12322		1.15606	-0.335817	0.823761	0.115369	1.03846	0.992029	0.712244	-0.130038	0.782222	0.420003	0.957447	1.01794	0.755349	-0.437811	0.726616	0.349514	0.861654	0.937298	0.620847	-0.391298	0.714065	-0.209482	0.623299	0.775038	0.479915	-0.440947	0.827367	0.170327	0.504714	0.714431	0.894336
		CUST_16719_PI416261804	1.43694	-0.31964	-0.293072	0.0767388	-0.0716569	-0.27622	0.2444	-0.462945	-0.764481	-0.195172		0.176338	0.561962	-0.603167	-0.069484	-0.546022	-0.323168	-0.28484	0.487937	-0.843985	-0.323902	-0.688312	-0.217554	-0.423017	0.575636	-0.930346	-0.299338	-0.663644	-0.253076	-0.37594	0.826156	-0.847315	-1.34618	-0.940428	-0.875122	-0.804444	1.19394	-0.302181	0.834625	0.376796	0.0614865	0.530927
		CUST_269_PI416408490	1.08576	0.120035	0.0513785	1.021	0.549888	0.589902	0.271433	0.16386	-0.155051	0.858757		0.994344	0.640604	0.0117028	0.175252	0.766196	0.445391	0.419018	0.590333	-0.0403807	0.240699	0.607449	0.506266	0.345465	0.691839	-0.188548	0.134779	0.655667	0.608933	0.316527	0.669561	-0.355081	-0.123417	0.289186	0.0252713	-0.0503734	0.827161	-0.0441742	0.45152	0.187713	0.30777	0.911378
		GABA transporter 1 (SLC6A1) / https://www.ncbi.nlm.nih.gov/gene/6529
			Parahippocampal gyrus						Temporal pole						Inferior temporal gyrus						Middle temporal gyrus						Superior temporal gyrus						Heschl's gyrus						caudate nucleus
			H0351, 2001	H0351,2002	H0351,1009	H0351,1012	H0351,1015	H0351,1016	H0351, 2001	H0351,2002	H0351,1009	H0351,1012	H0351,1015	H0351,1016	H0351, 2001	H0351,2002	H0351,1009	H0351,1012	H0351,1015	H0351,1016	H0351, 2001	H0351,2002	H0351,1009	H0351,1012	H0351,1015	H0351,1016	H0351, 2001	H0351,2002	H0351,1009	H0351,1012	H0351,1015	H0351,1016	H0351, 2001	H0351,2002	H0351,1009	H0351,1012	H0351,1015	H0351,1016	H0351, 2001	H0351,2002	H0351,1009	H0351,1012	H0351,1015	H0351,1016
		A_23_P166758	1.47648	-0.599623	-0.211997	0.535833	0.832392	0.262603	0.0761654	0.00871906	0.085007	-0.746105		0.43251	1.23598	-0.478345	0.300901	-0.369421	0.436885	0.0745655	1.25238	-0.41878	0.519593	-0.268835	0.61402	0.289392	1.38671	-0.428437	-0.00431461	-0.410271	-0.0521387	-0.132131	1.21284	-0.566957	-0.803352	-0.349989	-0.182261	-0.227965	1.1461	-0.62513	0.311627	-0.0566061	-0.113874	0.142555
		A_24_P268685	-0.630311	-0.353935	1.26736	0.744416	0.443593	-0.130614	-0.550001	-0.239161	0.880862	0.248927		0.814655	-0.710031	-0.142693	0.328861	1.03667	0.266138	0.335949	-0.342535	-0.203369	0.597577	1.22953	0.338287	0.551665	-0.355241	-0.129346	0.330116	1.16381	0.258749	0.222654	-0.53821	-0.081151	-0.114306	0.590295	0.454375	0.762951	-0.563952	-0.291111	0.26154	0.802337	0.14541	0.0671951
		GABA transporter 2 (SLC6A12) / https://www.ncbi.nlm.nih.gov/gene/6539
			Parahippocampal gyrus						Temporal pole						Inferior temporal gyrus						Middle temporal gyrus						Superior temporal gyrus						Heschl's gyrus						caudate nucleus
			H0351, 2001	H0351,2002	H0351,1009	H0351,1012	H0351,1015	H0351,1016	H0351, 2001	H0351,2002	H0351,1009	H0351,1012	H0351,1015	H0351,1016	H0351, 2001	H0351,2002	H0351,1009	H0351,1012	H0351,1015	H0351,1016	H0351, 2001	H0351,2002	H0351,1009	H0351,1012	H0351,1015	H0351,1016	H0351, 2001	H0351,2002	H0351,1009	H0351,1012	H0351,1015	H0351,1016	H0351, 2001	H0351,2002	H0351,1009	H0351,1012	H0351,1015	H0351,1016	H0351, 2001	H0351,2002	H0351,1009	H0351,1012	H0351,1015	H0351,1016
		A_23_P307382	-0.090652	0.0155847	0.239843	-0.0245599	0.348456	0.0185003	-0.103648	-0.00870656	0.453013	-0.127255		0.262546	0.134771	-0.103721	0.0752965	0.352674	0.134072	0.0661455	0.0699359	0.165911	0.12756	0.0508421	0.428137	0.11956	0.160441	0.205724	0.11611	-0.0673325	0.381996	0.142404	0.0332391	0.272994	-0.0585543	-0.183215	0.473729	0.328742	1.43536	1.58608	1.91937	1.45553	1.66113	1.57687
		CUST_5029_PI416261804	0.531457	-0.520658	0.0219997	-0.779045	-0.195914	-0.147497	-0.0837481	-0.402597	-0.0283062	-1.03982		-0.129767	0.57387	-0.341005	0.0707427	-0.738326	-0.26014	-0.232329	0.521631	-0.577095	0.0958806	-0.721167	-0.155019	0.0352052	0.726449	-0.431978	-0.0222193	-0.654262	-0.205022	-0.127856	0.656163	-0.40875	0.0260682	-0.575652	-0.41673	-0.104036	2.44035	1.29672	2.50389	1.85197	1.99422	2.18664
		CUST_583_PI416408490	-0.340769	0.654226	1.51847	-1.16181	-0.214061	0.48962	-0.373701	-0.0928249	-0.54063	-2.07839		-0.46263	-0.193655	0.50358	-0.556686	-1.42856	0.432027	0.126971	-0.057884	0.854003	-0.609965	-1.31264	0.428101	0.706565	-0.275532	1.25791	0.239471	-1.27281	0.2894	-0.261203	-0.302201	1.14081	-1.6992	-0.823032	1.95884	0.46574	1.13272	2.05493	1.24673	0.7374	1.26125	2.23115
		Vesicular GABA transporter (SLC32A1) / https://www.ncbi.nlm.nih.gov/gene/140679
			Parahippocampal gyrus						Temporal pole						Inferior temporal gyrus						Middle temporal gyrus						Superior temporal gyrus						Heschl's gyrus						caudate nucleus
			H0351, 2001	H0351,2002	H0351,1009	H0351,1012	H0351,1015	H0351,1016	H0351, 2001	H0351,2002	H0351,1009	H0351,1012	H0351,1015	H0351,1016	H0351, 2001	H0351,2002	H0351,1009	H0351,1012	H0351,1015	H0351,1016	H0351, 2001	H0351,2002	H0351,1009	H0351,1012	H0351,1015	H0351,1016	H0351, 2001	H0351,2002	H0351,1009	H0351,1012	H0351,1015	H0351,1016	H0351, 2001	H0351,2002	H0351,1009	H0351,1012	H0351,1015	H0351,1016	H0351, 2001	H0351,2002	H0351,1009	H0351,1012	H0351,1015	H0351,1016
		A_23_P307382	-0.090652	0.0155847	0.239843	-0.0245599	0.348456	0.0185003	-0.103648	-0.00870656	0.453013	-0.127255		0.262546	0.134771	-0.103721	0.0752965	0.352674	0.134072	0.0661455	0.0699359	0.165911	0.12756	0.0508421	0.428137	0.11956	0.160441	0.205724	0.11611	-0.0673325	0.381996	0.142404	0.0332391	0.272994	-0.0585543	-0.183215	0.473729	0.328742	1.43536	1.58608	1.91937	1.45553	1.66113	1.57687
		CUST_5029_PI416261804	0.531457	-0.520658	0.0219997	-0.779045	-0.195914	-0.147497	-0.0837481	-0.402597	-0.0283062	-1.03982		-0.129767	0.57387	-0.341005	0.0707427	-0.738326	-0.26014	-0.232329	0.521631	-0.577095	0.0958806	-0.721167	-0.155019	0.0352052	0.726449	-0.431978	-0.0222193	-0.654262	-0.205022	-0.127856	0.656163	-0.40875	0.0260682	-0.575652	-0.41673	-0.104036	2.44035	1.29672	2.50389	1.85197	1.99422	2.18664
		CUST_583_PI416408490	-0.340769	0.654226	1.51847	-1.16181	-0.214061	0.48962	-0.373701	-0.0928249	-0.54063	-2.07839		-0.46263	-0.193655	0.50358	-0.556686	-1.42856	0.432027	0.126971	-0.057884	0.854003	-0.609965	-1.31264	0.428101	0.706565	-0.275532	1.25791	0.239471	-1.27281	0.2894	-0.261203	-0.302201	1.14081	-1.6992	-0.823032	1.95884	0.46574	1.13272	2.05493	1.24673	0.7374	1.26125	2.23115
		Parvalbumin (PALVB)
			Parahippocampal gyrus						Temporal pole						Inferior temporal gyrus						Middle temporal gyrus						Superior temporal gyrus						Heschl's gyrus						caudate nucleus
			H0351, 2001	H0351, 200	1H0351,200	2H0351,200	2H0351,100	9H0351,100	H0351, 2001	H0351, 200	1H0351,200	2H0351,200	2H0351,100	9H0351,100	H0351, 2001	H0351, 200	1H0351,200	2H0351,200	2H0351,100	9H0351,100	H0351, 2001	H0351, 200	1H0351,200	2H0351,200	2H0351,100	9H0351,100	H0351, 2001	H0351, 200	1H0351,200	2H0351,200	2H0351,100	9H0351,100	H0351, 2001	H0351, 200	1H0351,200	2H0351,200	2H0351,100	9H0351,100	H0351, 2001	H0351, 200	1H0351,200	2H0351,200	2H0351,100	9H0351,100
		A_23_P17844	-0.625226	-0.489769	-0.403192	-0.74394	-0.0666671	-0.272861	-0.514837	-0.271505	-0.28714	-1.09466		-0.759481	-0.159647	0.20053	-0.324834	-0.222906	0.446857	-0.00129805	-0.0327907	0.324996	-0.00919692	-0.0946082	0.436176	0.0412919	0.0472163	0.480643	0.199576	0.0845631	0.420339	0.271849	0.0743027	0.77989	0.299573	0.315275	0.712675	0.777287	-1.39204	-0.895484	-1.36642	-1.4582	-0.840287	-1.1399
		CUST_11451_PI416261804	-0.568196	-0.429194	-0.432865	-0.673444	0.00434439	-0.256828	-0.477232	-0.183581	-0.275696	-1.02541		-0.689924	-0.134319	0.270403	-0.439808	-0.194212	0.49112	0.0540428	-0.0106954	0.360224	-0.0871915	-0.0378804	0.467475	0.0800935	0.0595394	0.510005	0.113461	0.145031	0.43793	0.314143	0.0642482	0.763007	0.208911	0.333024	0.703811	0.764114	-1.36738	-0.886566	-1.40317	-1.41762	-0.794815	-1.01093
		Calbindin (CALB1)
			Parahippocampal gyrus						Temporal pole						Inferior temporal gyrus						Middle temporal gyrus						Superior temporal gyrus						Heschl's gyrus						caudate nucleus
			H0351, 2001	H0351, 200	1H0351,200	2H0351,200	2H0351,100	9H0351,100	H0351, 2001	H0351, 200	1H0351,200	2H0351,200	2H0351,100	9H0351,100	H0351, 2001	H0351, 200	1H0351,200	2H0351,200	2H0351,100	9H0351,100	H0351, 2001	H0351, 200	1H0351,200	2H0351,200	2H0351,100	9H0351,100	H0351, 2001	H0351, 200	1H0351,200	2H0351,200	2H0351,100	9H0351,100	H0351, 2001	H0351, 200	1H0351,200	2H0351,200	2H0351,100	9H0351,100	H0351, 2001	H0351, 200	1H0351,200	2H0351,200	2H0351,100	9H0351,100
		A_23_P43197	-0.103346	-0.155018	0.045315	0.186314	0.083971	-0.0875925	0.129716	0.10102	0.0664691	0.421516		0.214153	0.126603	-0.0974675	-0.322497	0.317828	-0.141951	-0.173526	0.114467	-0.0960546	-0.240518	0.31235	-0.0437561	-0.186635	0.0634013	-0.190194	-0.24681	0.0775	-0.157911	-0.27448	-0.229188	-0.292642	-0.575622	-0.0397556	-0.380364	-0.265606	1.41618	1.34473	1.23886	1.40962	1.70224	1.60646
		CUST_140_PI416408490	-0.0309141	-0.589886	-0.0463913	-0.0961421	-0.238302	-0.0413297	0.027321	-0.0988492	0.0349245	0.128919		0.0607858	0.260903	-0.354696	-0.344995	0.0177244	-0.24345	-0.339172	0.202739	-0.41035	-0.293936	0.0557948	-0.217481	-0.357296	0.138144	-0.640809	-0.328522	-0.182255	-0.228615	-0.561611	-0.0504729	-0.56301	-0.734967	-0.347902	-0.483673	-0.606792	2.11165	1.37785	1.57794	1.68793	1.8697	1.92391
		CUST_16773_PI416261804	0.125669	-0.413137	-0.178487	0.0163828	0.0523041	-0.133821	0.269576	0.0764966	-0.212466	0.184429		0.0788304	0.299326	-0.230504	-0.312853	0.0773056	-0.144291	-0.26997	0.271711	-0.271864	-0.295419	0.0517849	-0.0492418	-0.296584	0.235231	-0.37344	-0.34874	-0.131239	-0.128808	-0.403191	0.0819163	-0.305547	-0.798173	-0.201737	-0.328757	-0.504985	1.87272	1.16608	1.30919	1.43515	1.5907	1.62021

## Sheet: Epigenetics
	Z-Score data tables for each of the genes analyzed. The columns correspond to the brain regions studied and the sub-columns to
	each of the individuals in the Allen Brain Institute atlas. The probes that hybridize to each gene are represented in the rows and the
	intersection between rows and columns corresponds to the Z-Score value of epigenetic regulation genes.
	Genes are represented by the name of the protein they are translated into, the gene ID in parentheses, and the web link to the ncbi library.
	EP300 / https://www.ncbi.nlm.nih.gov/gene/2033
		Parahippocampal gyrus						Temporal pole						Inferior temporal gyrus						Middle temporal gyrus						Superior temporal gyrus						heschl's gyrus						Caudate nucleus
		H0351, 2001	H0351,2002	H0351,1009	H0351,1012	H0351,1015	H0351,1016	H0351, 2001	H0351,2002	H0351,1009	H0351,1012	H0351,1015	H0351,1016	H0351, 2001	H0351,2002	H0351,1009	H0351,1012	H0351,1015	H0351,1016	H0351, 2001	H0351,2002	H0351,1009	H0351,1012	H0351,1015	H0351,1016	H0351, 2001	H0351,2002	H0351,1009	H0351,1012	H0351,1015	H0351,1016	H0351, 2001	H0351,2002	H0351,1009	H0351,1012	H0351,1015	H0351,1016	H0351, 2001	H0351,2002	H0351,1009	H0351,1012	H0351,1015	H0351,1016
	A_23_P40693	-1.2948	0.0513157	0.185009	1.03433	0.805282	0.428917	-0.167034	0.115324	-0.800295	0.704072		0.530583	-0.889229	-0.219378	0.0995818	0.951754	0.981314	0.448437	-0.884451	0.0517853	0.691445	1.00361	0.960709	0.695637	-1.05743	-0.0493176	0.0100187	0.760082	0.942958	0.652835	-1.05948	0.533675	0.150629	1.13367	1.33692	0.854303	-1.38585	-0.772525	0.19957	0.451772	-0.13202	-0.257671
	A_24_P7887	0.104445	-0.36027	-0.389458	0.507027	1.52473	0.22562	0.983324	0.349691	-0.78467	-0.965349		0.689745	0.219164	-0.302908	0.54591	-0.625726	1.38525	0.174262	0.472029	-0.468	0.622507	-0.592981	1.48845	0.683375	0.359351	-0.504355	0.0243414	-0.555977	1.20495	-0.0832257	0.329822	0.160653	-0.166845	-0.345799	1.3027	0.187689	0.042414	-0.676188	-0.0702496	0.225483	0.0966557	-0.0415679
	histone acetyltransferase 1 (HAT1) / https://www.ncbi.nlm.nih.gov/gene/8520
		Parahippocampal gyrus						Temporal pole						Inferior temporal gyrus						Middle temporal gyrus						Superior temporal gyrus						heschl's gyrus						Caudate nucleus
		H0351, 2001	H0351,2002	H0351,1009	H0351,1012	H0351,1015	H0351,1016	H0351, 2001	H0351,2002	H0351,1009	H0351,1012	H0351,1015	H0351,1016	H0351, 2001	H0351,2002	H0351,1009	H0351,1012	H0351,1015	H0351,1016	H0351, 2001	H0351,2002	H0351,1009	H0351,1012	H0351,1015	H0351,1016	H0351, 2001	H0351,2002	H0351,1009	H0351,1012	H0351,1015	H0351,1016	H0351, 2001	H0351,2002	H0351,1009	H0351,1012	H0351,1015	H0351,1016	H0351, 2001	H0351,2002	H0351,1009	H0351,1012	H0351,1015	H0351,1016
	A_23_P339480	-1.13612	0.184812	0.085892	1.50411	-0.309684	-0.210542	-0.681008	0.0930601	0.175421	0.418045		0.472523	-0.97107	0.126666	0.15397	0.51032	-0.326886	0.136959	-0.877254	0.0605177	0.678859	0.279988	-0.137963	0.592673	-0.808725	0.164436	0.232829	0.585309	-0.22303	0.180037	-0.874969	0.12128	-0.115755	0.578194	-0.339384	0.638309	-0.346128	0.272532	-0.106537	0.354526	-0.0894666	-0.0867755
	CUST_7791_PI416261804	-1.08897	-0.913382	-0.407021	1.4446	0.0301182	-0.0524861	-0.970793	-0.884294	-0.318674	0.433818		0.543306	-1.14353	-0.794084	-0.390701	0.560885	-0.190174	0.141495	-1.10152	-0.903181	0.110897	0.288295	0.110818	0.44568	-1.0541	-1.02685	-0.325588	0.683914	0.051051	0.158658	-0.663657	-0.531223	-0.869594	0.618885	0.18234	0.5992	-0.367172	-0.647968	-0.364362	0.61379	0.0149116	0.291935
	histone acetyltransferase (KAT2A) / https://www.ncbi.nlm.nih.gov/gene/2648
		Parahippocampal gyrus						Temporal pole						Inferior temporal gyrus						Middle temporal gyrus						Superior temporal gyrus						heschl's gyrus						Caudate nucleus
		H0351, 2001	H0351,2002	H0351,1009	H0351,1012	H0351,1015	H0351,1016	H0351, 2001	H0351,2002	H0351,1009	H0351,1012	H0351,1015	H0351,1016	H0351, 2001	H0351,2002	H0351,1009	H0351,1012	H0351,1015	H0351,1016	H0351, 2001	H0351,2002	H0351,1009	H0351,1012	H0351,1015	H0351,1016	H0351, 2001	H0351,2002	H0351,1009	H0351,1012	H0351,1015	H0351,1016	H0351, 2001	H0351,2002	H0351,1009	H0351,1012	H0351,1015	H0351,1016	H0351, 2001	H0351,2002	H0351,1009	H0351,1012	H0351,1015	H0351,1016
	A_23_P66608	-0.959673	0.169792	0.463236	-0.00261958	-0.0565841	-0.6657	-0.0586424	0.187207	-0.588196	-0.0715244		-0.066312	-0.481869	0.0737965	1.46924	0.177027	0.439156	0.0754599	-0.336583	-0.091786	1.40311	0.160835	0.848581	0.409835	-0.413283	0.0521017	1.14349	0.22274	0.707093	0.198714	-0.0029753	0.433542	0.893776	0.587503	0.301875	0.6815	-0.756205	-0.9619	0.471847	0.0829259	-0.0844825	-0.572837
	CUST_15611_PI416261804	-1.11982	-0.431032	0.706999	0.644163	0.795514	0.242064	-0.0418175	0.12126	0.644657	0.394122		0.905407	-0.863486	-0.10883	0.897177	0.558248	0.961954	0.576654	-0.561667	0.0701193	1.12336	0.957348	0.992552	0.791353	-0.538141	0.187099	1.19093	0.939141	1.08158	0.615591	-0.927932	0.321697	0.657926	0.837165	1.24568	1.05179	-1.40631	-1.08041	-0.0949844	0.165018	-0.15543	-0.457863
	histone acetyltransferase (KAT2B) / https://www.ncbi.nlm.nih.gov/gene/8850
		Parahippocampal gyrus						Temporal pole						Inferior temporal gyrus						Middle temporal gyrus						Superior temporal gyrus						heschl's gyrus						Caudate nucleus
		H0351, 2001	H0351,2002	H0351,1009	H0351,1012	H0351,1015	H0351,1016	H0351, 2001	H0351,2002	H0351,1009	H0351,1012	H0351,1015	H0351,1016	H0351, 2001	H0351,2002	H0351,1009	H0351,1012	H0351,1015	H0351,1016	H0351, 2001	H0351,2002	H0351,1009	H0351,1012	H0351,1015	H0351,1016	H0351, 2001	H0351,2002	H0351,1009	H0351,1012	H0351,1015	H0351,1016	H0351, 2001	H0351,2002	H0351,1009	H0351,1012	H0351,1015	H0351,1016	H0351, 2001	H0351,2002	H0351,1009	H0351,1012	H0351,1015	H0351,1016
	A_23_P41128	-0.115012	-0.704488	-0.120832	0.116567	-0.47833	-0.710889	-0.533039	-0.488278	0.0274064	-0.691904		-0.425669	-0.345117	-0.716662	-0.0807773	-0.826422	-1.09527	-0.782696	-0.353068	-0.726027	0.0448988	-0.773246	-0.972734	-0.512871	-0.269369	-0.850427	-0.654808	-0.733184	-1.25768	-1.0771	-0.200045	-0.79452	-0.635046	-0.670238	-1.051	-1.596	0.669701	0.250422	0.475364	0.627255	0.0269174	0.0303243
	A_32_P159651	-0.00187597	0.30933	0.760742	1.45768	-0.531113	0.192448	-0.632148	0.168778	0.793426	0.818177		0.649487	-0.384671	0.0398859	0.512332	0.633379	-0.898362	0.0964522	-0.209246	-0.0331115	0.906309	0.629545	-0.696213	0.300096	0.00851728	-0.00747173	0.0889733	0.731098	-0.898314	-0.368553	-0.0926367	-0.266816	0.0924642	0.371472	-0.722724	-0.21811	0.878143	0.649155	0.814824	0.977754	-0.0170162	0.586467
	Histone deacetylase 1 (HDAC1) / https://www.ncbi.nlm.nih.gov/gene/3065
		Parahippocampal gyrus						Temporal pole						Inferior temporal gyrus						Middle temporal gyrus						Superior temporal gyrus						Heschl's gyrus						Caudate nucleus
		H0351, 2001	H0351,2002	H0351,1009	H0351,1012	H0351,1015	H0351,1016	H0351, 2001	H0351,2002	H0351,1009	H0351,1012	H0351,1015	H0351,1016	H0351, 2001	H0351,2002	H0351,1009	H0351,1012	H0351,1015	H0351,1016	H0351, 2001	H0351,2002	H0351,1009	H0351,1012	H0351,1015	H0351,1016	H0351, 2001	H0351,2002	H0351,1009	H0351,1012	H0351,1015	H0351,1016	H0351, 2001	H0351,2002	H0351,1009	H0351,1012	H0351,1015	H0351,1016	H0351, 2001	H0351,2002	H0351,1009	H0351,1012	H0351,1015	H0351,1016
	A_23_P114656	-0.729183	0.0389425	-0.108532	0.697346	-0.755881	-0.625391	-1.2008	-0.409553	-0.19808	-0.24254		-0.0871459	-1.1785	-0.420161	-0.152825	-0.155312	-1.03273	-0.518683	-1.0042	-0.461015	0.236377	-0.285837	-1.00301	-0.0991318	-0.91782	-0.421935	-0.640013	-0.261467	-1.26758	-0.786906	-0.813101	-0.449401	-0.821254	-0.23618	-1.32706	-0.386809	0.00307425	0.0734196	0.197184	0.274074	-0.296512	-0.000930347
	CUST_16046_PI416261804	-0.562254	-0.692544	0.183748	-0.013455	-0.121035	0.0423922	-0.437551	-0.728181	-0.0298771	-0.741789		-0.582523	-0.921316	-0.779725	-0.280906	-0.70625	-0.387325	-0.681175	-0.594233	-0.890241	-0.150874	-0.751764	-0.405442	-0.844561	-0.574772	-0.684838	-0.604167	-0.657075	-0.572692	-0.900699	-1.20713	-0.306995	-0.0133846	-0.749923	-0.434043	-0.88456	-0.433974	-0.425933	-0.312153	-0.316707	-0.34277	-0.236822
	Histone deacetylase 3 (HDAC3) / https://www.ncbi.nlm.nih.gov/gene/8841
		Parahippocampal gyrus						Temporal pole						Inferior temporal gyrus						Middle temporal gyrus						Superior temporal gyrus						Heschl's gyrus						Caudate nucleus
		H0351, 2001	H0351,2002	H0351,1009	H0351,1012	H0351,1015	H0351,1016	H0351, 2001	H0351,2002	H0351,1009	H0351,1012	H0351,1015	H0351,1016	H0351, 2001	H0351,2002	H0351,1009	H0351,1012	H0351,1015	H0351,1016	H0351, 2001	H0351,2002	H0351,1009	H0351,1012	H0351,1015	H0351,1016	H0351, 2001	H0351,2002	H0351,1009	H0351,1012	H0351,1015	H0351,1016	H0351, 2001	H0351,2002	H0351,1009	H0351,1012	H0351,1015	H0351,1016	H0351, 2001	H0351,2002	H0351,1009	H0351,1012	H0351,1015	H0351,1016
	A_23_P7388	0.401667	-0.0759219	0.159629	0.598849	0.636343	0.0296757	0.233101	0.265334	-0.366189	0.875777		0.623811	-0.445172	0.0214144	0.0668665	0.657872	0.964168	0.276176	-0.277889	-0.00876991	-0.107516	0.595226	1.12166	0.417756	-0.320286	0.0409754	0.385232	0.778208	1.27166	0.55185	-0.499446	0.309394	0.0166761	0.522977	0.137108	0.936996	-0.778664	-0.776191	-0.233913	-0.21097	-0.151575	-0.205251
	CUST_14406_PI416261804	-0.242849	-0.282856	-0.981204	-0.585078	0.653739	1.2527	-1.45078	-0.848041	-0.809285	-0.673336		0.32556	-0.0805345	-0.293362	-0.98422	-0.975539	0.448185	0.181969	-0.368611	-0.240148	-0.796017	-0.67798	0.493531	0.459066	-0.0541657	-0.0577637	-0.820149	-0.684613	0.105039	-0.178682	0.160549	-0.446394	-1.5982	-1.31159	0.927803	0.0144446	0.018421	0.203895	-1.56042	-0.565184	-0.38109	1.10264
	Histone deacetylase 8 (HDAC8) / https://www.ncbi.nlm.nih.gov/gene/55869
		Parahippocampal gyrus						Temporal pole						Inferior temporal gyrus						Middle temporal gyrus						Superior temporal gyrus						Heschl's gyrus						Caudate nucleus
		H0351, 2001	H0351,2002	H0351,1009	H0351,1012	H0351,1015	H0351,1016	H0351, 2001	H0351,2002	H0351,1009	H0351,1012	H0351,1015	H0351,1016	H0351, 2001	H0351,2002	H0351,1009	H0351,1012	H0351,1015	H0351,1016	H0351, 2001	H0351,2002	H0351,1009	H0351,1012	H0351,1015	H0351,1016	H0351, 2001	H0351,2002	H0351,1009	H0351,1012	H0351,1015	H0351,1016	H0351, 2001	H0351,2002	H0351,1009	H0351,1012	H0351,1015	H0351,1016	H0351, 2001	H0351,2002	H0351,1009	H0351,1012	H0351,1015	H0351,1016
	A_23_P84922	-0.666552	0.0663812	0.190309	0.41338	0.937284	0.304948	0.432535	0.115851	0.258146	-0.029076		0.237798	0.118101	-0.0615756	0.373192	0.0636854	1.30584	0.472752	0.110654	-0.0518493	0.784487	-0.0907648	1.55311	0.522064	-0.0455373	0.0954236	0.694369	0.149357	1.46011	0.664985	0.0881658	0.115915	-0.487641	0.484987	0.8053	0.922211	-1.86569	-1.6033	-1.28541	-1.18132	-0.473545	-0.630791
	A_24_P254965	-0.200625	0.983753	-1.13645	-0.471225	0.65892	0.220526	-0.659123	-1.0292	-0.684575	-0.960258		0.169437	-0.101672	-0.971611	0.0493504	-1.08306	0.744276	-0.228018	-0.0302898	-1.27972	-0.0656824	-1.33088	0.766254	0.000605763	0.092638	-1.15701	-0.202949	-1.12498	0.484858	-0.191844	0.669082	-0.340771	-0.835076	-1.34113	0.413127	-0.320556	-1.20418	-1.25115	-1.22264	-1.12415	-0.732971	-0.751448
	Histone deacetylase 7 (HDAC7) / https://www.ncbi.nlm.nih.gov/gene/51564
		Parahippocampal gyrus						Temporal pole						Inferior temporal gyrus						Middle temporal gyrus						Superior temporal gyrus						Heschl's gyrus						Caudate nucleus
		H0351, 2001	H0351,2002	H0351,1009	H0351,1012	H0351,1015	H0351,1016	H0351, 2001	H0351,2002	H0351,1009	H0351,1012	H0351,1015	H0351,1016	H0351, 2001	H0351,2002	H0351,1009	H0351,1012	H0351,1015	H0351,1016	H0351, 2001	H0351,2002	H0351,1009	H0351,1012	H0351,1015	H0351,1016	H0351, 2001	H0351,2002	H0351,1009	H0351,1012	H0351,1015	H0351,1016	H0351, 2001	H0351,2002	H0351,1009	H0351,1012	H0351,1015	H0351,1016	H0351, 2001	H0351,2002	H0351,1009	H0351,1012	H0351,1015	H0351,1016
	A_23_P2582	-1.87931	0.0511612	0.162346	-0.767105	-0.855347	-0.00854261	-1.11393	-0.592285	-1.04392	-0.460011		0.077908	-1.48332	-0.685409	0.849081	-0.396945	-0.397141	0.0183997	-1.23952	-0.619392	0.939673	-0.176938	-0.441858	0.249702	-1.11237	-0.36082	0.509259	-0.267445	-0.44154	-0.0503951	-0.807425	-0.523042	-0.0261434	-0.485298	-0.167898	0.139357	-0.70481	0.312392	0.575379	0.556692	-0.485735	0.0561462
	A_24_P647146	-0.609133	-0.63075	0.0971502	-0.323688	-0.974497	-1.08012	-1.10817	-0.966974	-0.62311	-0.513136		-0.453593	-0.713904	-0.72667	0.861221	-0.509723	-0.832859	-0.687333	-0.70153	-0.85969	0.828909	-0.54399	-0.478224	-0.459404	-0.576137	-0.900781	0.00765551	-0.460175	-0.536889	-0.727432	0.0465324	-0.693212	0.125566	-0.214526	-0.90163	-0.670265	0.133314	-0.72261	0.830754	0.61057	-0.426612	-0.67588
	euchromatic histone lysine methyltransferase 1 (EHMT1) / https://www.ncbi.nlm.nih.gov/gene/79813
		Parahippocampal gyrus						Temporal pole						Inferior temporal gyrus						Middle temporal gyrus						Superior temporal gyrus						Heschl's gyrus						Caudate nucleus
		H0351, 2001	H0351,2002	H0351,1009	H0351,1012	H0351,1015	H0351,1016	H0351, 2001	H0351,2002	H0351,1009	H0351,1012	H0351,1015	H0351,1016	H0351, 2001	H0351,2002	H0351,1009	H0351,1012	H0351,1015	H0351,1016	H0351, 2001	H0351,2002	H0351,1009	H0351,1012	H0351,1015	H0351,1016	H0351, 2001	H0351,2002	H0351,1009	H0351,1012	H0351,1015	H0351,1016	H0351, 2001	H0351,2002	H0351,1009	H0351,1012	H0351,1015	H0351,1016	H0351, 2001	H0351,2002	H0351,1009	H0351,1012	H0351,1015	H0351,1016
	A_23_P20894	-0.0769757	-0.122095	-0.111728	0.374758	0.381421	0.011424	0.0693973	0.354856	0.0195113	-0.413739		-0.214299	-0.279967	0.0896411	1.03199	-0.134117	0.623886	-0.277183	0.0352214	0.31443	0.883196	-0.159399	0.752923	-0.131306	0.192446	0.250093	0.640837	0.236499	0.744983	-0.431118	0.534056	0.370021	-0.137818	0.481753	0.0644962	0.125766	0.274743	-0.264524	0.515835	0.248928	-0.136567	0.31263
	A_23_P217120	-0.342577	-0.0946452	-0.640714	0.504995	-0.565514	0.875194	-0.873185	-0.590871	-1.37336	0.0742036		-0.219568	-0.640389	-0.224923	0.162596	0.350983	-0.33798	-0.389853	-0.31939	-0.0818388	0.272921	0.57518	-0.196888	0.0866943	-0.11402	0.0364547	-0.426385	0.526599	-0.53541	-0.411981	0.333343	0.285404	0.214199	0.364971	0.153396	0.0254107	1.02645	0.121795	1.02437	1.45809	0.425531	0.547202
	euchromatic histone lysine methyltransferase 2 (EHMT2) / https://www.ncbi.nlm.nih.gov/gene/10919
		Parahippocampal gyrus						Temporal pole						Inferior temporal gyrus						Middle temporal gyrus						Superior temporal gyrus						Heschl's gyrus						Caudate nucleus
		H0351, 2001	H0351,2002	H0351,1009	H0351,1012	H0351,1015	H0351,1016	H0351, 2001	H0351,2002	H0351,1009	H0351,1012	H0351,1015	H0351,1016	H0351, 2001	H0351,2002	H0351,1009	H0351,1012	H0351,1015	H0351,1016	H0351, 2001	H0351,2002	H0351,1009	H0351,1012	H0351,1015	H0351,1016	H0351, 2001	H0351,2002	H0351,1009	H0351,1012	H0351,1015	H0351,1016	H0351, 2001	H0351,2002	H0351,1009	H0351,1012	H0351,1015	H0351,1016	H0351, 2001	H0351,2002	H0351,1009	H0351,1012	H0351,1015	H0351,1016
	A_23_P214638	-0.272269	0.276154	0.931008	0.181355	-0.112564	-0.427179	-0.669532	0.894996	0.410443	-0.535163		-0.367058	-0.858665	0.285766	1.31027	-0.1521	0.167821	-0.319886	-0.716639	0.33386	1.37572	-0.0988692	0.492147	-0.307172	-0.559523	0.284919	0.726192	-0.0716535	0.375669	-0.368602	-0.110305	-0.110305	0.976632	-0.05495	-0.54922	-0.608658	1.02708	0.157385	2.34772	0.801887	0.971018	1.07545
	A_24_P303390	-0.0272087	0.604177	0.238447	0.331912	0.942464	0.235144	0.426334	0.872159	0.98188	-0.598937		-0.182227	-0.0340513	0.346083	2.10942	-0.344324	0.911106	-0.277211	0.345089	0.386218	1.87988	-0.425498	1.43901	-0.168755	0.348204	0.420823	1.61438	-0.58194	1.24111	-0.405855	0.0245647	1.07061	0.282598	-0.0803181	0.199374	-0.28921	0.242109	-0.158637	1.5808	-0.224332	0.366898	0.291433
	A_24_P801451	-0.98972	1.39762	1.15707	0.781477	0.540105	0.594137	0.183075	1.47674	0.899892	0.360734		0.45692	-0.491463	1.17686	0.896261	0.367777	0.866241	0.470659	-0.38038	1.24248	1.26233	0.366994	1.09725	0.440955	-0.272457	1.31903	1.28693	0.481292	1.05596	0.403447	-0.962069	1.71864	1.15502	0.795567	0.685797	0.350886	-0.608361	0.796624	0.899923	-0.281918	0.663537	0.841607
	lysine methyltransferase 2E (KMT2E) / https://www.ncbi.nlm.nih.gov/gene/55904
		Parahippocampal gyrus						Temporal pole						Inferior temporal gyrus						Middle temporal gyrus						Superior temporal gyrus						Heschl's gyrus						Caudate nucleus
		H0351, 2001	H0351,2002	H0351,1009	H0351,1012	H0351,1015	H0351,1016	H0351, 2001	H0351,2002	H0351,1009	H0351,1012	H0351,1015	H0351,1016	H0351, 2001	H0351,2002	H0351,1009	H0351,1012	H0351,1015	H0351,1016	H0351, 2001	H0351,2002	H0351,1009	H0351,1012	H0351,1015	H0351,1016	H0351, 2001	H0351,2002	H0351,1009	H0351,1012	H0351,1015	H0351,1016	H0351, 2001	H0351,2002	H0351,1009	H0351,1012	H0351,1015	H0351,1016	H0351, 2001	H0351,2002	H0351,1009	H0351,1012	H0351,1015	H0351,1016
	A_24_P196704	0.232244	-1.19124	0.305105	0.97993	1.23373	-0.153479	-0.715722	-0.504283	0.212589	-0.64775		0.0177002	-0.0731972	-0.713126	0.636133	-0.498449	0.961636	-0.132249	0.0913403	-0.674851	0.640405	-0.515685	1.15221	0.19113	0.413527	-0.685402	0.114704	-0.277115	0.897371	-0.108644	0.558414	-0.256106	-0.420971	-0.144742	1.10732	-0.106017	0.396842	-0.77368	0.727159	0.309751	0.454954	-0.0381555
	A_24_P411863	0.870407	-1.05016	-0.837555	-0.761346	-0.335879	-0.38347	-0.706597	-0.882195	-1.02181	-1.50119		0.021979	0.666999	-1.06584	0.537446	-1.05757	-0.303279	-0.100561	0.512939	-1.12572	0.668292	-1.04285	0.130434	0.339783	0.828945	-1.2707	-0.218265	-0.85744	-0.241714	0.0507712	1.79958	-0.989451	0.5243	-0.496408	-0.499579	-0.112076	0.558082	-1.0022	0.562593	0.0408554	-0.483236	0.137455
	lysine demethylase 4A (KDM4A) / https://www.ncbi.nlm.nih.gov/gene/9682
		Parahippocampal gyrus						Temporal pole						Inferior temporal gyrus						Middle temporal gyrus						Superior temporal gyrus						Heschl's gyrus						Caudate nucleus
		H0351, 2001	H0351,2002	H0351,1009	H0351,1012	H0351,1015	H0351,1016	H0351, 2001	H0351,2002	H0351,1009	H0351,1012	H0351,1015	H0351,1016	H0351, 2001	H0351,2002	H0351,1009	H0351,1012	H0351,1015	H0351,1016	H0351, 2001	H0351,2002	H0351,1009	H0351,1012	H0351,1015	H0351,1016	H0351, 2001	H0351,2002	H0351,1009	H0351,1012	H0351,1015	H0351,1016	H0351, 2001	H0351,2002	H0351,1009	H0351,1012	H0351,1015	H0351,1016	H0351, 2001	H0351,2002	H0351,1009	H0351,1012	H0351,1015	H0351,1016
	A_23_P74446	0.339564	-1.16631	-0.11461	0.528728	0.595328	-0.0172031	0.239745	-1.16201	-0.213079	-0.106394		0.113146	0.0861928	-1.24529	1.04763	-0.142611	0.680265	-0.031366	0.291475	-1.34171	0.99087	-0.19917	0.960129	0.173482	0.260134	-1.24301	0.49707	-0.214835	0.757881	-0.0651341	0.369965	-0.874283	-0.166334	-0.0692003	-0.221336	0.120826	0.847905	-1.26499	1.07969	0.913008	0.63184	0.386474
	CUST_14122_PI416261804	-0.0508914	-0.432075	0.0403635	0.921436	1.39834	0.776941	0.535079	-0.308785	0.0239975	0.211798		0.913689	0.311927	-0.393435	0.865055	0.449924	1.52487	0.768325	0.500889	-0.426412	1.1476	0.359907	1.655	0.960258	0.397049	-0.398212	0.866481	0.42408	1.46951	0.715609	0.293631	-0.388144	0.247667	0.190397	1.21941	0.956856	-0.0216113	-0.945109	0.246089	0.342709	0.501601	0.631717
	lysine demethylase 1A (KDM1A) / https://www.ncbi.nlm.nih.gov/gene/23028
		Parahippocampal gyrus						Temporal pole						Inferior temporal gyrus						Middle temporal gyrus						Superior temporal gyrus						Heschl's gyrus						Caudate nucleus
		H0351, 2001	H0351,2002	H0351,1009	H0351,1012	H0351,1015	H0351,1016	H0351, 2001	H0351,2002	H0351,1009	H0351,1012	H0351,1015	H0351,1016	H0351, 2001	H0351,2002	H0351,1009	H0351,1012	H0351,1015	H0351,1016	H0351, 2001	H0351,2002	H0351,1009	H0351,1012	H0351,1015	H0351,1016	H0351, 2001	H0351,2002	H0351,1009	H0351,1012	H0351,1015	H0351,1016	H0351, 2001	H0351,2002	H0351,1009	H0351,1012	H0351,1015	H0351,1016	H0351, 2001	H0351,2002	H0351,1009	H0351,1012	H0351,1015	H0351,1016
	A_24_P74981	-0.247522	-0.287738	0.358239	1.375	0.224874	-0.595029	-0.327641	0.206401	0.608377	0.436888		-0.406701	-0.221703	-0.433621	0.480337	0.694746	0.0895002	-0.700371	-0.371685	-0.195296	0.76114	0.408509	0.109795	-0.655436	0.0514357	-0.313947	0.894546	0.827439	-0.0984549	-0.535634	0.0204773	-0.463993	-0.282305	0.61026	-0.82496	-0.527748	-1.07617	-1.38497	-0.897199	-0.60171	-1.1978	-0.750058
	CUST_15145_PI416261804	-0.329112	0.358189	0.621604	1.19018	0.588835	0.312352	0.172319	0.428449	0.433816	0.337622		0.388411	0.119399	0.314804	1.14748	0.701046	0.955666	0.125894	0.0417323	0.102044	1.41388	0.441672	1.21487	0.300622	0.126074	0.322672	1.47256	0.80445	0.576252	0.190766	0.662363	0.60276	0.576131	0.768769	0.603525	0.352506	-0.413656	-0.902804	0.157769	0.286548	0.0337821	0.16515
	lysine demethylase 1B (KDM1B) / https://www.ncbi.nlm.nih.gov/gene/221656
		Parahippocampal gyrus						Temporal pole						Inferior temporal gyrus						Middle temporal gyrus						Superior temporal gyrus						Heschl's gyrus						Caudate nucleus
		H0351, 2001	H0351,2002	H0351,1009	H0351,1012	H0351,1015	H0351,1016	H0351, 2001	H0351,2002	H0351,1009	H0351,1012	H0351,1015	H0351,1016	H0351, 2001	H0351,2002	H0351,1009	H0351,1012	H0351,1015	H0351,1016	H0351, 2001	H0351,2002	H0351,1009	H0351,1012	H0351,1015	H0351,1016	H0351, 2001	H0351,2002	H0351,1009	H0351,1012	H0351,1015	H0351,1016	H0351, 2001	H0351,2002	H0351,1009	H0351,1012	H0351,1015	H0351,1016	H0351, 2001	H0351,2002	H0351,1009	H0351,1012	H0351,1015	H0351,1016
	A_23_P145035	0.967232	-1.05067	-0.60891	-0.00722937	-0.421333	-0.490933	0.0773833	-0.0734777	-0.695425	-0.101763		0.011218	0.575312	-0.436789	-0.0634652	-0.207378	-0.836018	-0.848455	0.329157	-0.615698	-0.374444	-0.50794	-0.626511	-0.706036	0.52287	-0.605653	-0.549946	-0.56274	-0.837437	-0.670231	0.574334	-1.05067	-0.646107	-0.656449	-0.948905	-1.35543	1.48964	0.498268	0.914133	0.640638	0.309558	0.305254
	A_23_P338401	0.172428	-0.832828	-0.543841	1.2666	0.484648	0.343183	0.47243	0.497373	-0.0724968	1.23363		0.997853	0.32113	-0.433098	0.122979	0.984495	0.0937238	0.277845	0.28814	-0.386217	-0.0576179	0.90891	0.0130917	0.178896	0.0395714	-0.696808	-0.298595	0.645341	-0.00381201	-0.148674	-0.502623	-1.14935	-0.159744	0.768076	-0.380212	-0.966043	0.444	0.342066	0.474695	1.10784	0.871901	0.523332
	lysine demethylase 5B (KDM5B) / https://www.ncbi.nlm.nih.gov/gene/10765
		Parahippocampal gyrus						Temporal pole						Inferior temporal gyrus						Middle temporal gyrus						Superior temporal gyrus						Heschl's gyrus						Caudate nucleus
		H0351, 2001	H0351,2002	H0351,1009	H0351,1012	H0351,1015	H0351,1016	H0351, 2001	H0351,2002	H0351,1009	H0351,1012	H0351,1015	H0351,1016	H0351, 2001	H0351,2002	H0351,1009	H0351,1012	H0351,1015	H0351,1016	H0351, 2001	H0351,2002	H0351,1009	H0351,1012	H0351,1015	H0351,1016	H0351, 2001	H0351,2002	H0351,1009	H0351,1012	H0351,1015	H0351,1016	H0351, 2001	H0351,2002	H0351,1009	H0351,1012	H0351,1015	H0351,1016	H0351, 2001	H0351,2002	H0351,1009	H0351,1012	H0351,1015	H0351,1016
	A_23_P1038	0.393046	-0.318409	0.584394	0.913846	1.3488	0.241156	1.24196	0.358026	-0.166472	0.0674436		0.0592647	0.443166	-0.260964	0.813578	0.0608294	1.09812	-0.137644	0.613154	-0.561051	0.790329	-0.038813	0.976625	-0.269138	0.371757	-0.641548	0.716685	-0.207327	0.970409	-0.0249128	0.645998	-0.455286	1.12772	0.492255	0.429278	-0.514458	0.770501	-0.0308516	1.17755	1.4124	1.84749	0.954713
	A_32_P70724	-0.277161	-0.250564	0.768435	1.17833	0.0934239	-0.14411	0.112064	-0.131032	0.163025	1.32901		0.36021	0.084822	-0.166064	0.862073	1.31401	0.0138469	0.235207	0.177322	-0.238728	0.977248	1.58528	0.130803	0.456091	0.0298162	-0.405243	0.72965	1.2731	0.0480371	0.407392	-0.0859784	-0.387731	0.885449	1.14099	-0.309783	0.279374	-0.229706	0.23359	0.79767	1.24557	1.02876	0.855841
